1 **Incorporating evaporative water loss into bioenergetic models of hibernation to test for**  
2 **relative influence of host and pathogen traits on white-nose syndrome**

3  
4 Short title: Modelling the dehydration hypothesis with WNS

5  
6 Catherine G. Haase,<sup>1\*+</sup> Nathan W. Fuller,<sup>2</sup> C. Reed Hranac,<sup>3</sup> David T. S. Hayman,<sup>3</sup> Liam P.  
7 McGuire,<sup>2</sup> Kaleigh J. O. Norquay,<sup>4</sup> Kirk A. Silas,<sup>5</sup> Craig K. R. Willis,<sup>4</sup> Raina K. Plowright,<sup>1†</sup>  
8 Sarah H. Olson<sup>5†</sup>

9  
10 <sup>1</sup> Department of Microbiology and Immunology, Montana State University, Bozeman, USA.

11 <sup>2</sup> Department of Biological Sciences, Texas Tech University, Lubbock, USA.

12 <sup>3</sup> Molecular Epidemiology and Public Health Laboratory, Hopkirk Research Institute, Massey  
13 University, NZL.

14 <sup>4</sup> Department of Biology, University of Winnipeg, Winnipeg, CAN.

15 <sup>5</sup> Wildlife Conservation Society, Wildlife Health Program, Bronx, USA.

16 †RKP and SHO are joint senior authors

17  
18 \*Corresponding author [haasec@apsu.edu](mailto:haasec@apsu.edu)

19  
20 †Current address:

21 Department of Biology, Austin Peay State University, Clarksville, USA

22

23 **Abstract**

24 Hibernation consists of extended durations of torpor interrupted by periodic arousals. The  
25 ‘dehydration hypothesis’ proposes that hibernating mammals arouse to replenish water lost  
26 through evaporation during torpor. Arousals are energetically expensive, and increased arousal  
27 frequency can alter survival throughout hibernation. Yet we lack a means to assess the effect of  
28 evaporative water loss (EWL), determined by animal physiology and hibernation microclimate,  
29 on torpor bout duration and subsequent survival. White-nose syndrome (WNS), a devastating  
30 disease impacting hibernating bats, causes increased frequency of arousals during hibernation  
31 and EWL has been hypothesized to contribute to this increased arousal frequency. WNS is  
32 caused by a fungus, which grows well in humid hibernaculum environments and damages wing  
33 tissue important for water conservation. Here, we integrated the effect of EWL on torpor  
34 expression in a hibernation energetics model, including the effects of fungal infection, to  
35 determine the link between EWL and survival. We collected field data for *Myotis lucifugus*, a  
36 species that experiences high mortality from WNS, to gather parameters for the model. In  
37 saturating conditions we predicted healthy bats experience minimal mortality. Infected bats,  
38 however, suffer high fungal growth in highly saturated environments, leading to exhaustion of  
39 fat stores before spring. Our results suggest that host adaptation to humid environments leads to  
40 increased arousal frequency from infection, which drives mortality across hibernaculum  
41 conditions. Our modified hibernation model provides a tool to assess the interplay between host  
42 physiology, hibernaculum microclimate, and diseases such as WNS on winter survival.

43 **Keywords:** dehydration hypothesis, hibernation, *Myotis lucifugus*, *Pseudogymnoascus*  
44 *destructans*, torpor, white-nose syndrome

45           In periods of food scarcity, hibernators conserve energy by entering torpor, during which  
46 body temperature ( $T_b$ ) is maintained near hibernaculum temperature and metabolic rate is  
47 lowered to reduce energy demands [1]. There are several hypotheses proposed to explain  
48 periodic arousals, but two of the most prominent are linked to water balance: 1) the dehydration  
49 hypothesis [2,3]; and 2) the need to excrete metabolic byproducts [4]. The dehydration  
50 hypothesis suggests that hibernators arouse periodically after a threshold of total body water is  
51 reached [5,6]. The metabolic byproducts hypothesis suggests that bats accumulate byproducts  
52 from biochemical reactions during torpor, and these byproducts need to be excreted as waste as  
53 they can be damaging to cellular function [4]. Both of these hypotheses are affected by  
54 microclimate, which is supported by empirical evidence of the relationship between  
55 hibernaculum temperature and relative humidity and torpor bout duration [3,5,7,8]. Hibernators  
56 do not normally defecate or urinate during torpor [9], thus water lost during inactive periods of  
57 hibernation is assumed to be from evaporation. Evaporative water loss (EWL) is comprised of  
58 respiratory and cutaneous water loss [10,11] and is driven by the difference in water vapor  
59 pressure between the surface of an animal and the surrounding air, which, in turn, is determined  
60 by the saturation of the air given air temperature [12]. The dehydration hypothesis is supported  
61 by correlations between torpor bout duration/arousal frequency and hibernaculum temperature  
62 and relative humidity in both free living and laboratory conditions [2,5,13].

63           Though arousals only make up a small portion of hibernation time, these periods account  
64 for the majority of the winter energy budget [1,14]. Therefore, the influence of microclimate on  
65 arousal frequency is critical for over-winter fat loss. However, the influence of microclimate has  
66 recently become an important question in the context of white-nose syndrome (WNS). WNS is a  
67 rapidly spreading infectious disease that has led to high mortality rates in hibernating bats across

68 eastern and central North America. It has been proposed that increased EWL from infection  
69 could be a trigger of increased arousals associated with WNS [13,15].

70 The causal agent of WNS is a psychrophilic fungus, *Pseudogymnoascus destructans*,  
71 which erodes wing tissue [16,17]. Mechanistic models and empirical evidence connecting *P.*  
72 *destructans* infection to altered torpor-arousal cycles suggest that ulceration of the highly  
73 vascularized wing tissues causes increased fluid and water loss [13,18–21]. The growth rate of *P.*  
74 *destructans* is linked to both ambient temperature [22] and humidity [23], with higher fungal  
75 growth rates in environmental conditions frequently found in bat hibernacula.

76 Although studies have linked arousal frequency with survival, and hibernaculum  
77 microclimate and EWL with arousal frequency, none have explicitly considered the effect of  
78 EWL on survival to our knowledge. Hibernation energetic models are commonly used to  
79 understand energy consumption over winter but have yet to account for water balance and its  
80 effect on arousal behavior. With the current threat of WNS, a disease that potentially directly  
81 impacts water balance, it is important to understand the implications surrounding the association  
82 of EWL, energy consumption, and survival. We therefore developed a hibernation energetics  
83 model that incorporates water balance to assess the effects of the dehydration hypothesis on  
84 survival of *Myotis lucifugus*, a wide-ranging species that is heavily impacted by WNS. Using  
85 WNS as a study system, we tested the hypothesis that increased EWL from fungal infection  
86 results in greater energy consumption due to increased arousal frequency and, therefore, reduced  
87 survival. We predicted that hibernaculum conditions that reduce EWL (cold temperatures, high  
88 relative humidity) would increase our modeled survival rates. We also predicted that model  
89 parameters that influence EWL (surface area, area-specific rate of EWL), would have greater  
90 effects on modeled survival rates compared to other parameters.

91 Building on equations developed by Thomas et al. [1], Humphries et al. [24], and  
92 Hayman et al. [25], we included the effects of hibernaculum microclimate on fungal growth,  
93 EWL, torpor bout duration, and total fat loss. We parameterized the model using morphometric  
94 and physiological characteristics collected from *M. lucifugus* captured in the field. We validated  
95 the modified model components using a variety of data sources, determined the most influential  
96 parameters using a sensitivity analysis, and predicted fat loss over a range of hibernaculum  
97 conditions for both healthy and *P. destructans*-infected bats. Finally, in the context of winter  
98 duration, we inferred the impact of WNS on survival by comparing pre-hibernation fat stores to  
99 fat loss estimated by the energy expenditure model.

## 100 **Methods**

### 101 *Ethics statement*

102 All procedures were approved by the Texas Tech University Institutional Animal Care and Use  
103 Committee (protocol 16031-05) and followed guidelines of the Guide for the Care and Use of  
104 Laboratory Animals. We obtained proper permits from the Montana Department of Fish,  
105 Wildlife & Parks (permits 2016-104, 2017-018, and 2018-008).

### 106 *Study species*

107 *M. lucifugus* is a common insectivorous bat species found across most of North America [26].  
108 The hibernation behavior of *M. lucifugus* is well-studied. During the winter, *M. lucifugus*  
109 hibernate in caves and abandoned mines, often in large colonies [26]. Most hibernacula have  
110 stable microclimates, with high humidity ( $\geq 90$  % RH) and temperatures ranging from 2 to 8 °C  
111 [8,27,28]. Many energetic models have determined energy expenditure during hibernation in  
112 response to microclimate selection, sex, and location [1,8,24,29–35]. Energetic models have  
113 been used to predict energy expenditure from WNS with alterations to arousal frequency [21,32].

114 *M. lucifugus* is also one of the most studied species in terms of WNS impacts. Since the  
115 discovery of WNS in 2006, millions of *M. lucifugus* have died across the species' range and have  
116 faced upwards of 99% mortality rates [28,36,37]. Populations across eastern and mid-western  
117 North America affected by WNS remain at severely reduced population sizes and reduced  
118 population growth rates [36,38,39].

#### 119 *Field data collection for model parameters*

120 We captured *M. lucifugus* during the pre-hibernation (September-November) swarming and mid-  
121 hibernation (January-February) periods from 2016-2018 at a cave in central Montana. We used  
122 mist nets placed at the cave entrance to capture bats during swarming and hand-captured bats  
123 from hibernaculum walls during mid-hibernation. We transported bats in cloth bags to a mobile  
124 laboratory at the field site location for morphometric measurements. We weighed each bat ( $\pm 0.1$   
125 g) and used quantitative magnetic resonance (Echo-MRI-B, Echo Medical Systems, Houston,  
126 TX) to measure fat mass and lean mass [40]. We measured torpid metabolic rate (TMR) and  
127 EWL using open-flow respirometry at 2, 5, 8, and 10 °C (Supplementary Materials; [41]). We  
128 calculated the mean body mass, fat mass, and lean mass across all fall field seasons and the mean  
129 of mass-specific TMR across both seasons among all individuals across to use as parameters in  
130 the hibernation model (Table 1).

131 Table 1. Parameters for the energetics model for the little brown bat (*Myotis lucifugus*), their units, and the reference.

| Parameter Name                                        | Parameter              | Value                                                        | Units                                                              | Reference                |
|-------------------------------------------------------|------------------------|--------------------------------------------------------------|--------------------------------------------------------------------|--------------------------|
| Basal metabolic rate                                  | BMR                    | 2.6                                                          | ml O <sub>2</sub> g <sup>-1</sup> h <sup>-1</sup>                  | Calculated from [55]     |
| Minimum torpid metabolic rate                         | TMR <sub>min</sub>     | 0.14                                                         | ml O <sub>2</sub> g <sup>-1</sup> h <sup>-1</sup>                  | Measured in this study   |
| Lower defended temperature during torpor              | T <sub>tor - min</sub> | 2                                                            | °C                                                                 | [48–50]                  |
| Lower critical temperature                            | T <sub>lc</sub>        | 32                                                           | °C                                                                 | [48–50]                  |
| Euthermic body temperature                            | T <sub>eu</sub>        | 37                                                           | °C                                                                 | [1,48–50]                |
| Change in torpid metabolism                           | Q <sub>10</sub>        | 1.6 + 0.26 T <sub>a</sub> - 0.006T <sub>a</sub> <sup>2</sup> | -                                                                  | [48]                     |
| Torpid thermal conductance                            | C <sub>t</sub>         | 0.20                                                         | ml O <sub>2</sub> g <sup>-1</sup> °C <sup>-1</sup> h <sup>-1</sup> | Calculated from [73]     |
| Euthermic thermal conductance                         | C <sub>eu</sub>        | 0.26                                                         | ml O <sub>2</sub> g <sup>-1</sup> °C <sup>-1</sup> h <sup>-1</sup> | Calculated from [27]     |
| Wing surface area                                     | SA <sub>wing</sub>     | 19.68                                                        | cm <sup>2</sup>                                                    | Calculated in this study |
| Body surface area                                     | SA <sub>body</sub>     | 39.26                                                        | cm <sup>2</sup>                                                    | Calculated from [53]     |
| Area-specific rate of evaporative water loss for wing | rEWL <sub>wing</sub>   | 0.33                                                         | mg hr <sup>-1</sup> ΔWVP <sup>-1</sup> cm <sup>-2</sup>            | Calculated in this study |
| Area-specific rate of evaporative water loss for body | rEWL <sub>body</sub>   | 0.10                                                         | mg hr <sup>-1</sup> ΔWVP <sup>-1</sup> cm <sup>-2</sup>            | Calculated in this study |
| Time in euthermia per arousal                         | t <sub>eu</sub>        | 1.10                                                         | h                                                                  | [31,74,75]               |
| Maximum time in torpor                                | t <sub>tor-max</sub>   | 1300                                                         | h                                                                  | [51]                     |
| Specific heat of tissue                               | S                      | 0.173                                                        | ml O <sub>2</sub> g <sup>-1</sup> °C <sup>-1</sup>                 | [14]                     |
| Rewarming rate                                        | WR                     | 0.80                                                         | °C min <sup>-1</sup>                                               | [44,58,76,77]            |
| Body mass                                             | M <sub>b</sub>         | 7.80                                                         | g                                                                  | Measured in this study   |
| Proportion of lean mass                               | pLean                  | 0.58                                                         | g                                                                  | Measured in this study   |
| Proportion of fat mass                                | pFat                   | 0.26                                                         | g                                                                  | Measured in this study   |
| Proportion of body water threshold                    | pMass                  | 0.027                                                        | mg                                                                 | Calculated in this study |
| Humidity-dependent fungal growth parameter            | μ <sub>1</sub>         | 1.51 x 10 <sup>-4</sup>                                      | -                                                                  | [25]                     |
| Humidity-dependent fungal growth parameter            | μ <sub>2</sub>         | -9.92 x 10 <sup>-3</sup>                                     | -                                                                  | [25]                     |
| Temperature-dependent fungal growth parameter         | β <sub>1</sub>         | 1.15 x 10 <sup>-3</sup>                                      | -                                                                  | [25]                     |
| Temperature-dependent fungal growth parameter         | β <sub>2</sub>         | 0.27                                                         | -                                                                  | [25]                     |

132 We measured hibernaculum temperature and relative humidity over each hibernation  
133 period using HOBO (Model U23-001,  $\pm 0.001$  °C,  $\pm 0.001\%$  RH, Onset Computer Corporation)  
134 and iButton (temperature only; Model DS1921Z-F5,  $\pm 0.05$  °C, Maxim Integrated Products)  
135 dataloggers. We placed four HOBO and ten iButton dataloggers throughout the hibernaculum in  
136 the fall and recorded conditions at 3 h intervals. We determined the main winter roosting location  
137 from personal communication with U.S. Forest Service and Montana Department of Fish,  
138 Wildlife, and Parks personnel. We placed two HOBO loggers in the main roost, a large cathedral  
139 room at the back of the cave (one logger at the far end, one at the entrance), one within 3 m of  
140 the entrance of the cave, and one attached to a tree immediately outside the cave entrance ( $< 10$   
141 m). We spaced the iButtons evenly throughout the cave system from the entrance to the cathedral  
142 room. We suspended HOBO loggers with copper wire and used pantyhose to attach each iButton  
143 to a projected rock to suspend the logger in the air column. We collected loggers from the  
144 hibernaculum in the spring of each year.

145 We estimated winter duration for central Montana by acoustically monitoring bat activity  
146 at the entrance to the cave (Anabat Roost Logger RL1, Titley Scientific). The acoustic logger  
147 operated between 30 min before sunset and 30 min following sunrise. We used AnaLookW  
148 software (v4.3) to digitize calls and count the number of bat passes per day [42]. We were not  
149 interested in species-specific calls, but rather use the calls as an index of winter duration so we  
150 counted passes that contained calls of *Myotis* species (minimum frequency [ $f_{\min}$ ]  $> 30$  kHz) to  
151 filter out noise [43]. We were also not interested in the number of individual bats passing the  
152 detector, but rather if there was general activity outside the cave; we thus used a threshold of 50  
153 passes day<sup>-1</sup>, defining the lower end of the 95% of bat counts, to determine the onset and end of  
154 the hibernation period [43].



155 *Incorporating evaporative water loss into the hibernation energetics model*

156 We revised the hibernation energetics model first described by Thomas et al. [1] and Humphries  
157 [24], and then modified to include fungal growth by Hayman et al. [25]. The model estimates the  
158 amount of fat consumed during hibernation as a summation of the energy expended during  
159 multiple torpor-arousal bouts across a winter period (full model presented in Supplementary  
160 Materials). We derived estimates of the energy required during torpor ( $E_{tor}$ ), euthermia ( $E_{eu}$ ), and  
161 the warming ( $E_{warm}$ ) and cooling ( $E_{cool}$ ) periods between torpid and euthermic temperatures. We  
162 estimated the period of each arousal spent within euthermia from literature (Table 1) and the  
163 time to warm and cool were calculated given published warming and cooling rates, respectively  
164 [44].

165 We incorporated a mechanistic link between EWL and torpor bout duration. We  
166 estimated torpor bout duration ( $t_{tor}$ ) in two ways: 1) as a function of torpid metabolic rate in  
167 response to ambient temperature ( $T_a$ ) as described in Hayman et al. [25], and 2) as a function of  
168 EWL. Our revised model uses the shorter of the two estimates given hibernaculum conditions  
169 (Supplementary Figure S1), either arousing as a consequence of EWL or TMR, whichever comes  
170 first. By including both calculations in our estimates of torpor bout duration, we considered both  
171 the effect of EWL and metabolism on torpor physiology [45,46].

172 To estimate torpor bout duration as a function of metabolic rate ( $t_{torTMR}$ ), we modified the  
173 existing equations developed by Hayman et al. [25] that scale maximum possible time in torpor  
174 ( $t_{torMax}$ ) by the effects of metabolic rate given  $T_a$ :

175 
$$t_{torTMR} = \frac{t_{torMax}}{Q} \left( \frac{T_a - T_{torMin}}{10} \right) \quad \text{if } T_a > T_{torMin} \quad (1)$$

176 
$$t_{torTMR} = \frac{t_{torMax}}{1 + (T_{torMin} - T_a) \cdot \left( \frac{c_t}{TMR_{min}} \right)} \quad \text{if } T_a \leq T_{torMin} \quad (2)$$

177 where  $Q_{10}$  is the change in metabolism with a 10°C change in temperature [47],  $T_{\text{torMin}}$  is the  
178 minimum defended  $T_b$  in torpor,  $\text{TMR}_{\text{min}}$  is the associated metabolic rate at  $T_{\text{torMin}}$ , and  $C_t$  is the  
179 thermal conductance during torpor. Minimum defended  $T_b$  [48–50] and the maximum time in  
180 torpor ( $t_{\text{torMax}}$ ) were estimated from literature [51], and minimum torpid metabolic rate and  
181 thermal conductance were measured in the field using respirometry (Supplementary Materials).

182 To calculate torpor bout duration as a function of EWL ( $t_{\text{torEWL}}$ ), we assumed bats arouse  
183 when the total body water pool was depleted to a threshold [5]. The hourly rate of total EWL  
184 ( $\text{mg H}_2\text{O h}^{-1}$ ) is comprised of both cutaneous and respiratory rates of EWL and is dependent on  
185 the water vapor pressure deficit between the bat and the surrounding environment. The hourly  
186 rate of cutaneous evaporative water loss (CEWL;  $\text{mg H}_2\text{O h}^{-1}$ ) is a function of the difference  
187 between water vapor pressure at the surface of the bat and the environment ( $\Delta\text{WVP}$ ):

$$188 \quad \Delta\text{WVP} = \text{WVP}_{\text{bat}} - \text{WVP}_{\text{air}} \quad (3)$$

189 where  $\text{WVP}_{\text{bat}}$  is the water vapor pressure at the skin surface and  $\text{WVP}_{\text{air}}$  is the water vapor  
190 pressure of the surrounding air (both in kPa). We assumed  $\text{WVP}_{\text{bat}}$  was at saturation, which can  
191 be calculated as:

$$192 \quad \text{WVP}_{\text{bat}} = 0.611 \cdot e^{\left[ \frac{17.503 \cdot T_b}{(T_b + 240.97)} \right]} \quad (4)$$

193 where  $T_b$  is the body temperature of the bat in torpor [52]. We then calculated  $\text{WVP}_{\text{air}}$  at  $T_a$  and  
194 given relative humidity. We modeled cutaneous EWL as a function of  $\Delta\text{WVP}$  and the area-  
195 specific rate of EWL from bodily tissue (rEWL;  $\text{mg H}_2\text{O h}^{-1} \text{cm}^{-2}$  per  $\Delta\text{WVP}^{-1}$ ) across the surface  
196 area ( $\text{SA}$ ;  $\text{cm}^2$ ) of the bat:

$$197 \quad \text{CEWL} = \text{SA} \cdot \text{rEWL} \cdot \Delta\text{WVP} \quad (5)$$

198 We used a surface area scaling equation [53] to calculate body surface area ( $\text{SA}_{\text{body}}$ ) and photos  
199 of bat wings to estimate the total surface area of the wings and tail ( $\text{SA}_{\text{wing}}$ ; Supplementary

200 Materials). Assuming that a furred body and naked wing have biophysical differences that would  
201 affect cutaneous EWL, we used different values of the area-specific rate of EWL for the body  
202 ( $rEWL_{body}$ ) and wing ( $rEWL_{wing}$ ), estimated from respirometry (Supplementary Materials).

203 Therefore, we rewrote Equation 5 as:

$$204 \quad CEWL = [(SA_{body} \cdot rEWL_{body}) + (SA_{wing} \cdot rEWL_{wing})] \cdot \Delta WVP \quad (6)$$

205 Respiratory EWL (REWL;  $\text{mg H}_2\text{O h}^{-1}$ ) is a function of the saturation deficit between  
206 inspired and expired air. We assumed that inspired air is at  $T_a$  and is expired as saturated air at  
207 torpid  $T_b$  [5]. Therefore, we calculated respiratory EWL as:

$$208 \quad REWL = \text{respired air volume} \cdot \text{saturation deficit} \quad (7)$$

209 The volume of air that a bat breathes per hour was calculated as a function of the respiration rate  
210 of oxygen (i.e.  $TMR_{min}$ ) in  $\text{ml O}_2 \text{g}^{-1} \text{h}^{-1}$  and body mass:

$$211 \quad \text{respired air volume} = \frac{TMR_{min} \cdot M_b}{0.2095 \cdot 0.30 \cdot 10^3} \quad (8)$$

212 assuming the fractional concentration of oxygen in air is 0.2095 and that oxygen extraction  
213 efficiency is 30% [5]. Using the ideal gas law [52], we converted the water vapor pressure deficit  
214 ( $\Delta WVP$ ; Equation 3) from kPa to  $\text{mg L}^{-1}$  to determine the saturation deficit.

215 We validated the rate of total EWL (cutaneous EWL and respiratory EWL) by comparing  
216 modeled EWL (from Equations 5 and 7) to measured EWL from each individual during our  
217 respirometry procedures. We used individual body mass (Equations 5-6), metabolic rate  
218 (Equations 7-8), area-specific rate of EWL (Equations 5-6), and predicted surface area given  
219 body mass (Equations 5-6). We modeled the hourly rate of total EWL given the measured  $T_a$  and  
220 WVP experienced by each individual. We used linear regression to compare modeled EWL to  
221 measured EWL rates, assuming that if the model was accurate, the slope of the relationship  
222 should be equal to 1.

223 Given total EWL, we calculated torpor bout duration ( $t_{torEWL}$ ) based on the reduction of  
 224 the total body water pool, setting the threshold at 2.7% of lean mass (assuming no body water in  
 225 fat stores):

$$226 \quad t_{torEWL} = \frac{0.027 \cdot \text{Lean Mass} \cdot 1000}{CEWL + REWL} \quad (9)$$

227 *Including the effects of fungal growth on hibernation*

228 We further adjusted the hibernation model by including a link between fungal growth and  
 229 reduced torpor bout duration through an increase in both metabolic rate and EWL (modifying  
 230 Equations 1-2, 9). We first altered the estimation of torpor bout duration from  $T_a$  ( $t_{torTMR}$ ;  
 231 Equations 1 and 2) by scaling  $t_{torTMR}$  by the proportion the bat wing surface affected by the  
 232 fungus. When fungal growth  $> 0$ ,  $t_{torTMR}$  was calculated as:

$$233 \quad t_{torTMR} = \left[ \frac{t_{torMax}}{\left( \frac{T_a - T_{torMin}}{10} \right)} \right] / \left( \frac{area_{Pd}}{SA_{wing}} \right) \quad \text{if } T_a > T_{torMin} \quad (10)$$

$$234 \quad t_{torTMR} = \left[ \frac{t_{tor-max}}{1 + (T_{torMin} - T_a) \cdot \left( \frac{C_t}{TMR_{min}} \right)} \right] / \left( \frac{area_{Pd}}{SA_{wing}} \right) \quad \text{if } T_a \leq T_{torMin} \quad (11)$$

235 where  $area_{Pd}$  is the area ( $\text{cm}^2$ ) of fungal growth calculated as a function of  $T_b$  and relative  
 236 humidity given equations from Hayman et al. [25].

237 We adjusted the calculation of torpor bout duration in response to EWL ( $t_{torEWL}$ ; Equation  
 238 9) by increasing CEWL and REWL as a function of fungal growth. We used data from McGuire  
 239 et al. [20], who directly measured an increase in TMR and EWL in *M. lucifugus* infected with *P.*  
 240 *destructans* (Supplementary Materials). We increased CEWL by including a linear increase to  
 241 the rate of EWL of bat wings ( $rEWL_{wing}$ ) in response to the proportion the bat wing surface  
 242 affected by the fungus (from Equation 6):

243 
$$CEWL_{wing} = \left[ (SA_{body} \cdot rEWL_{body}) + \left( SA_{wing} \cdot \left[ rEWL_{wing} + \left( 0.16 \cdot \frac{area_{pd}}{SA_{wing}} \cdot 100 \right) \right] \right) \right] \cdot \Delta WVP \quad (12)$$

244 where 0.16 is the rate of increase in  $rEWL_{wing}$ , given the proportion the bat wing surface affected  
245 by the fungus, determined from data presented in McGuire et al. [20] (Supplementary Materials).  
246  $REWL$  also is hypothesized to increase in response to fungal growth with an increase in TMR;  
247 we included this linear increase by adjusting Equation 8:

248 
$$respired\ air\ volume = \frac{\left[ TMR_{min} + \left( 0.015 \cdot \frac{area_{pd}}{SA_{wing}} \cdot 100 \right) \right] \cdot M_b}{0.2095 \cdot 0.30 \cdot 10^3} \quad (13)$$

249 where 0.015 is the linear increase of torpid metabolic rate given the proportion the bat wing  
250 surface affected by the fungus (Supplementary Materials).

251 To validate the adjustment to the estimation of torpor bout duration in response to fungal  
252 growth (Equations 10-11,13), we used an independent dataset of skin temperature measurements  
253 from a captive hibernation study by McGuire et al. [54]. Skin temperature data were measured  
254 from thirteen *M. lucifugus* infected with *P. destructans* prior to hibernating in a controlled  
255 environment ( $T_a = 7^\circ\text{C}$ , relative humidity = 98%). Using methodology from Jonasson and Willis  
256 [31], we defined torpor and arousal periods based on cut-off temperatures and calculated the total  
257 time in each hibernation phase. We then estimated torpor bout duration (Equations 10-13) at  
258 each measured torpor bout from each individual given individual morphometric parameters  
259 (initial body mass, predicted surface area). We estimated TMR from body mass and  $T_b$  [55] and  
260 allowed for variation in lean mass (to determine threshold of body water) by sampling from a  
261 normal distribution with mean and standard deviation from our capture data. We predicted fungal  
262 growth area at each torpor bout given the time since inoculation and equations 2-4 in Hayman et  
263 al [25]. We then used a linear model to compare modeled torpor bout duration to measured  
264 torpor bout duration, assuming that if the prediction was accurate, the slope of the relationship

265 should be equal to 1. To determine if including EWL improved our description of torpor  
266 expression, we also predicted torpor bout duration without the contribution of EWL using only  
267 Equations 10-11. We then compared these predictions to measured bout duration to determine  
268 model accuracy. Finally, we compared the  $R^2$  values of both fitted relationships to determine  
269 which model had better precision in predicting torpor bout duration.

#### 270 *Estimation of total fat loss and survival for M. lucifugus in Montana*

271 Using our modified hibernation model and model parameters obtained from our field captures  
272 and literature (Table 1), we estimated time until total fat exhaustion for *M. lucifugus* over the  
273 range of hibernaculum microclimate conditions measured at our field site. Torpor bout duration  
274 changes with body condition and fungal growth so we used differential equations to estimate  
275 energy consumption over the winter. We assumed that bats require energy to arouse at the end of  
276 hibernation and to leave the hibernaculum in order to obtain food. Therefore, we included energy  
277 required to warm ( $E_{warm}$ ) and spend 24 h in euthermia ( $24 \times E_{eu}$ ) at the end of winter hibernation.  
278 We used the lsoda function of the *deSolve* package, which allowed torpor bout duration to  
279 change over time given fungal growth, bat parameters (Table 1), and hibernaculum  
280 microclimate. We converted total energy consumed over time from ml  $O_2$   $g^{-1}$  to the amount of fat  
281 expended (g) as:

$$282 \quad fat_{winter} = (E_{winter} \cdot 19.6)/(37.6 \cdot 1000) \quad (14)$$

283 assuming that 1 ml  $O_2$  releases 19.6 J of energy and the energy content of fat is 37.6 J  $mg^{-1}$  [30].

284 We calculated time until fat exhaustion ( $t_{fatEx}$ ) as the time when total fat exhaustion ( $fat_{winter}$ ),  
285 became greater than mean fat stores measured during our fall field captures. Finally, we  
286 compared the estimated  $t_{fatEx}$  for both healthy and infected bats over the range of hibernaculum  
287 conditions to the duration of winter for central Montana estimated from our acoustic data. We

288 assumed that mortality would occur if  $t_{\text{fatEx}}$  was less than winter duration; that is, the mean fat  
289 stores did not provide enough fat for a bat to survive through winter, as measured above.

290 We validated the entirety of the hibernation energetic model by comparing measured  
291 mass loss from 56 free-living hibernating *M. lucifugus* (Norquay and Willis, unpublished data,  
292 but see [56] for description of capture methodology and locations) to predicted fat loss from our  
293 model. We used this dataset because data from captive animals may not accurately reflect field  
294 conditions of free-living animals. We used individuals in which mass was measured during both  
295 swarming (August-September) and emergence (April-May). We estimated fat loss using the  
296 bioenergetic model for the time between swarming and emergence capture dates, given the  
297 hibernaculum conditions where each bat was captured [57,58]. We took the mean and standard  
298 deviation of  $T_a$  and water vapor pressure of each capture location and sampled random values  
299 from a normal distribution for each individual. We estimated TMR from body mass and  $T_b$  [55]  
300 and allowed for variation in lean mass by sampling from a normal distribution set at the mean  
301 and standard deviation from our capture data. We compared estimated fat loss with measured  
302 mass loss (assuming all mass change is due to fat loss) using linear regression, assuming if the  
303 two values were the same, the slope of the relationship would be no different than 1. We also  
304 predicted fat loss for the validation dataset given the hibernation model without the inclusion of  
305 EWL; more specifically, we only included Equations 1-2 in our calculations of torpor bout  
306 duration. We compared these predictions to measured mass loss and determined both model  
307 accuracy (slope = 1) and precision ( $R^2$ ) to compare against our modified model including EWL.

308 Following Hayman et al. [25], we used a multi-parameter sensitivity analysis to assess  
309 the impact of each parameter on estimations of time until mortality. Using Latin hypercube  
310 sampling in R package *lhs*, we created 100 random parameter sets sampled from a uniform

311 distribution of potential values ranging from 10% lower or higher than the default value (Table  
312 1). By constraining the minimum and maximum values of the parameters, and including a joint  
313 distribution within the Latin hypercube sampling, we considered the potential for correlations  
314 between parameters. We determined the relative importance of each variable by comparing  
315 partial rank correlation coefficients (PRCC) values. Positive PRCC values indicate an increase in  
316 the model output with an increase in the parameter value, while negative PRCC values indicate a  
317 decrease in the model output with an increase in parameter value [25].

## 318 **Results**

319 We captured 219 *M. lucifugus* over the capture periods of 2016-2018 (176 during fall, 43 during  
320 winter; Table 2). There was minimal variation in hibernaculum microclimate measured by the  
321 HOBO and iButton loggers within the hibernaculum (temperature: mean =  $4.80 \pm 0.60$  °C, range  
322 =  $2.77 - 5.68$  °C; water vapor pressure deficit: mean =  $0.11 \pm 0.26$  kPa, range =  $0.00 - 2.57$  kPa)  
323 across winters (Figure 1). We found all bats roosting in the cathedral room, where hibernaculum  
324 microclimate was stable throughout the winter ( $T_a = 4.8$  °C, RH = 100%). Activity decreased <  
325 50 passes day<sup>-1</sup> by mid-October (mean date among years 14 October) and increased beyond 50  
326 passes day<sup>-1</sup> by mid-April (mean date among years 13 April). We therefore concluded that  
327 hibernation duration in central Montana was 181 days.

328

329 Table 2. Morphometric and physiological data measured from *Myotis lucifugus* captured at a  
330 hibernaculum in central Montana. *N* = sample size, TMR: mass-specific torpid metabolic rate,  
331 EWL: mass-specific evaporative water loss.

| Variable      | Value $\pm$ SD  | <i>N</i> |
|---------------|-----------------|----------|
| Body mass (g) | $8.30 \pm 0.98$ | 176      |
| Fat mass (g)  | $2.09 \pm 0.74$ | 65       |



|                                                            |                 |    |
|------------------------------------------------------------|-----------------|----|
| Lean mass (g)                                              | $4.56 \pm 0.72$ | 65 |
| TMR (ml O <sub>2</sub> g <sup>-1</sup> h <sup>-1</sup> )   | $0.03 \pm 0.02$ | 49 |
| EWL (mg H <sub>2</sub> O g <sup>-1</sup> h <sup>-1</sup> ) | $0.93 \pm 0.60$ | 49 |

332 **Figure 1.** (A) Hibernaculum temperature (°C) and (B) water vapor pressure deficit (kPa) deep  
333 within the hibernaculum where *Myotis lucifugus* are found during hibernation (black line), at the  
334 entrance of the hibernaculum (purple line), and outside the hibernaculum entrance (blue line).  
335 Both the entrance (purple) and inside the hibernaculum (black) were at saturation the entire  
336 winter period.

337

338 Measured EWL from our respirometry procedures in dry air (0% relative humidity)  
339 ranged from 0.31 to 1.53 mg H<sub>2</sub>O h<sup>-1</sup> g<sup>-1</sup> (mean:  $0.71 \pm 0.25$  mg H<sub>2</sub>O h<sup>-1</sup> g<sup>-1</sup>) depending on  
340 temperature and individual. Our model accurately predicted EWL for *M. lucifugus* in Montana  
341 ( $F_{1,61} = 570.3$ ,  $p < 0.001$ ,  $slope = 0.97$  [0.89, 1.06]; Figure 2a). Given the hibernaculum  
342 conditions measured at the roosting location ( $T_a = 4.8$  °C, RH = 100%), we predicted EWL from  
343 *M. lucifugus* as  $0.06 \pm 0.40$  mg H<sub>2</sub>O h<sup>-1</sup> g<sup>-1</sup> in healthy bats (Supplementary Figure S2). *P.*  
344 *destructans* had no impact on EWL early in infection, but by late hibernation had increased EWL  
345 to 2.19 mg H<sub>2</sub>O h<sup>-1</sup> g<sup>-1</sup> (Supplementary Figures S2).

346

347 **Figure 2.** Comparison of measured and modeled (A) evaporative water loss (EWL), (B) torpor  
348 bout duration, and (C) fat loss in *Myotis lucifugus*. EWL and fat loss were measured/modeled in  
349 healthy bats, while torpor bout duration was measured/modeled in bats that were inoculated with  
350 *P. destructans*. Dashed lines represent one-to-one line and solid lines represent fitted relationship  
351 with 95% confidence intervals (shaded blue).

352

353 Our model accurately estimated torpor bout duration in captive bats infected with *P.*  
354 *destructans* ( $F_{1,32} = 18.64$ ,  $p = 0.0001$ ,  $slope = 0.65$  [0.43, 1.16]; Figure 2b), but the estimates  
355 had a wide variance and lacked precision (only 25% of the variation in the data was explained by  
356 the model). Without the inclusion of EWL, however, the model did not accurately describe  
357 torpor bout duration ( $F_{1,32} = 0.40$ ,  $p = 0.53$ ,  $slope = -0.15$  [-0.59, 0.30]) and did not describe  
358 variation in the data ( $R^2 = 0.02$ ). We therefore predicted torpor bout duration using our modified  
359 model including EWL. For healthy bats, torpor bouts lasted  $16.10 \pm 5.04$  days within the  
360 microclimate conditions of the hibernaculum at the field site (range: 4.54 – 18.3 days;  
361 Supplementary Figure S3). Torpor bouts ranged from < 1 day to 18.3 days (mean:  $6.20 \pm 5.40$   
362 days) for bats infected with *P. destructans* (Supplementary Figure S3).

363 Our modified hibernation model accurately predicted mass loss in healthy wild bats ( $F_{1,47}$   
364  $= 74.38$ ,  $p < 0.0001$ ,  $slope = 0.87$  [0.67, 1.07]; Figure 2c). Though there was a lack of individual  
365 metabolic rate and EWL data for the bats used in this validation procedure, our model still  
366 explained 62% of the variation in the dataset. Our model was also more precise than the  
367 hibernation model that lacked EWL, which was not accurate ( $F_{1,47} = 1.04$ ,  $p = 0.84$ ,  $slope = -$   
368  $0.02$  [-0.18, 0.15]) and described less than 1% of the variation in the data. Using the model with  
369 EWL, the mean time until total fat exhaustion for healthy *M. lucifugus* predicted in the  
370 hibernaculum microclimate conditions at our field site in Montana was  $317.5 \pm 105.50$  days  
371 (Figure 3a) at a rate of  $0.006 \pm 0.002$  g day<sup>-1</sup>. Bats were predicted to survive for over 360 days in  
372 the microclimate selected for roosting ( $T_a = 4.8$  °C, RH = 100%). The shortest time until fat  
373 exhaustion (176 days) was at the warmest temperature available in the hibernaculum (5.5 °C)  
374 and lowest humidity (90%). Almost all other available microclimate conditions within the

375 hibernaculum (2-5 °C and > 90% RH) result in predicted hibernation duration greater than winter  
376 duration (181 days).

377

378 **Figure 3.** Predicted number of days until fat exhaustion for (A) healthy and (B) *P. destructans* -  
379 infected little brown bats (*Myotis lucifugus*) over a range of hibernaculum temperature (°C) and  
380 water vapor deficit (kPa) values. Contours represent hibernaculum conditions that allow survival  
381 for specific winter duration (in months); dark black contour indicates 6 months, the estimated  
382 hibernation duration at our study site in central Montana. White area bounded by grey line  
383 represents impossible parameters space for each temperature (e.g. at 2 °C, air is saturated at 0.50  
384 kPa and cannot hold more water).

385

386         Within the hibernaculum conditions available at our field site, we predicted a higher and  
387 more variable rate of fat loss (range: 0.006 – 0.32 g day<sup>-1</sup>) for infected bats. In the specific  
388 hibernaculum conditions selected for roosting within these conditions, infected bats lost 0.01 ±  
389 0.001 g day<sup>-1</sup> at the beginning of hibernation (< 14 days) while the rate of fat loss increased to  
390 0.03 ± 0.01 g day<sup>-1</sup> at the end of hibernation (181 days). Almost all microclimate conditions  
391 available at our field site resulted in mortality for infected bats as time until fat exhaustion was  
392 less than hibernation duration (mean: 131.23 ± 38.40 days; Figure 3b). The only available  
393 microclimate conditions that permitted survival were at the lowest temperatures (2 – 3 °C) and  
394 highest humidity conditions (96 – 100%) but these locations were not selected by any healthy  
395 bats within this hibernaculum. Bats selected saturated environments that were within the  
396 temperature range that allowed fungal growth, resulting in increased energy expenditure and  
397 ultimately decreased time until total fat exhaustion.

398 Our sensitivity analysis revealed that fat loss was influenced by host-specific parameters,  
399 including body mass, the proportions of body mass comprised of fat and lean mass, and  
400 parameters that influenced EWL, including wing surface area and the area-specific rates of  
401 cutaneous EWL (Figure 4). Model parameters that were most influential to survival were  
402 physical traits that vary both within and among species. There was little effect of metabolic rate  
403 during torpor or euthermia, nor time spent euthermic.

404

405 **Figure 4.** Sensitivity analyses for model calculating total fat exhaustion in hibernating bats  
406 infected with *P. destructans*. Dashed lines signify confidence intervals ( $\alpha = 0.05$ ). Positive PRCC  
407 values indicate an increase in predicted time until total fat exhaustion with an increase in  
408 parameter value; negative values indicate a decrease in predicted time until fat exhaustion with  
409 an increase in parameter value.

410

## 411 **Discussion**

412 With the continued spread of WNS, it is imperative to understand the effects of hibernaculum  
413 microclimate (temperature and humidity) on fungal growth, host physiology, and winter survival.  
414 A model that includes effects of EWL on arousal frequencies within the study system of WNS,  
415 can improve understanding of the role of EWL on the evolution of hibernation and the interplay  
416 of host physiology with the environment. We showed that host parameters, particularly body  
417 mass, fat mass, and area-specific rate of EWL, were important drivers of torpor bout duration.  
418 Our results suggest that factors associated with EWL and arousal frequency are key elements for  
419 predicting the effects of WNS on hibernating bats.

420 Our modified hibernation bioenergetic model predicted torpor behavior similar to torpor-  
421 arousal behavior observed in wild *M. lucifugus* populations. For instance, Reeder et al. [59]  
422 measured torpor bouts of  $16.32 \pm 6.65$  days and Czenze et al. [35] measured bouts of  $16.2 \pm 11.4$   
423 days in similar conditions where we predicted bouts of  $16.1 \pm 5.04$  days in the Montana cave  
424 system (Supplementary Figure 2b). Observations of torpor behavior in WNS-affected bats  
425 corroborated our predictions of torpor bout duration ( $6.20 \pm 5.40$  days; Supplementary Figure  
426 2b): wild populations of *M. lucifugus* remained in torpor for  $7.93 \pm 2.49$  days [59], while captive  
427 populations averaged  $6.48 \pm 0.76$  days [60]. Similarly, Reeder et al. [59] determined a negative  
428 relationship between wing damage due to fungal growth and torpor bout duration, which is  
429 aligned with how we incorporated the effect of infection in our model. Overall, the fidelity of the  
430 model implies that our prediction of torpor bout duration as a function of EWL is biologically  
431 relevant and representative of hibernation physiology and behavior.

432 We showed complete survival capacity (100% survival) in the entire microclimate space  
433 inhabited by healthy *M. lucifugus* in a cave system in central Montana (Figure 3a).  
434 Unfortunately, these hibernaculum temperatures and predicted torpor bout durations are  
435 comparable to hibernacula inhabited by highly impacted *M. lucifugus* populations in WNS-  
436 affected regions [28,35,39]. We predicted almost complete mortality (11% survival) for *M.*  
437 *lucifugus* within the current hibernaculum conditions in this cave system, in part because the  
438 high humidity selected by hibernating bats also results in high fungal growth [22,23]. Our  
439 predictions are consistent with population trends observed in WNS-affected regions in eastern  
440 North America, where similar hibernaculum microclimates have resulted in high mortality (80-  
441 98%) [39]. However, our model predicts a small window of microclimate space that would allow  
442 for survival, where cooler temperatures and moderate humidity reduce fungal growth, resulting

443 in longer torpor bout duration and decreased arousal frequency (Figure 3b; Supplementary  
444 Figure S2). Our model predictions are consistent with observations of WNS-affected bats  
445 roosting in colder temperatures compared to unaffected bats [59,61]. These observations, in  
446 conjunction with our predictions, suggest that *M. lucifugus* within the Montana cave system  
447 would be highly impacted by WNS, but could potentially survive if individuals seek out cooler  
448 microclimates. Alternatively, if there are cooler microclimates available, those individuals that  
449 already prefer these conditions will survive while others will not. If microclimate preference is  
450 heritable, there is the potential for evolutionary rescue [62,63].

451 Our modified hibernation energetics model relies on measurements of the response of *P.*  
452 *destructans* to temperature from the lab and modeled response to relative humidity based on  
453 previous work [25]. Multiple studies reported diverse *P. destructans* responses to microclimate  
454 conditions [22,23,37,64,65], potentially due to subtle differences in laboratory procedures, and  
455 thus our predictions of fungal growth may not perfectly represent wild conditions. Additionally,  
456 parameters we used to estimate the increase in both metabolic rate and the rate of cutaneous  
457 EWL were derived from a single captive study [20]. However, results of studies of the effects of  
458 WNS on torpor patterns in wild and free-ranging bats are similar [59,66]. Additionally, our  
459 sensitivity analysis indicates that the predictions did not change significantly in response to  
460 changes in the temperature and humidity-dependent fungal growth rates or the increase to  
461 metabolic rate and EWL (Figure 4). Although future research into humidity-dependent fungal  
462 growth rate parameters on wild bats within natural conditions is warranted to increase our  
463 understanding of these dynamics, our predictions are consistent with the data currently available.

464 Evidence of at least some *M. lucifugus* populations with greater fat stores persisting post-  
465 WNS [67–71] corroborates our findings from our sensitivity analysis that fat mass is a major

466 driver of WNS-survival (Figure 4). Large fat stores allow for increased arousal frequency  
467 associated with infection with *P. destructans* and extend the time until total fat exhaustion.  
468 Currently, we assess the costs of infection on the mean parameters – that is, body mass, fat mass,  
469 and lean mass represent the center of the distribution of morphometric characteristics if we  
470 assume a symmetrical distribution. Given evidence of the importance of body mass and fat, we  
471 would expect that some individuals from the Montana population would survive in the sampled  
472 hibernaculum if they had greater fat stores. It is therefore important that we further our research  
473 on the drivers of intra- and interspecific variation in overwintering survival from WNS.

474         The relationship between water vapor pressure and fungal growth indicates the potential  
475 for mitigation of WNS impacts if bats roost in microclimates below saturation – that is, infected  
476 individuals may trade-off water conservation with energy minimization. In healthy bats,  
477 maximum survival was at saturation (100% RH; Figure 3a). As saturation leads to negligible  
478 EWL [5], bats can remain in torpor longer before dehydration leads to arousal [46]; thus,  
479 roosting in saturated microclimates minimizes energetic costs. However, because *P. destructans*  
480 growth increases with water vapor pressure [23], infected bats had lower survival at saturation  
481 compared to less humid environments (Figures 3b). This hypothesis is supported by evidence of  
482 a relationship between increased population growth rate in multiple species and decreased  
483 relative humidity in regions post-WNS infection [39]; hibernacula with less than 90% relative  
484 humidity were the only microclimates to have population growth rates above zero, which aligns  
485 with our predictions of reduced survival at saturation.

486         Our model supports the role of EWL as a driver of periodic arousals in hibernation, and  
487 contributes to addressing one of the longest-standing questions in hibernation biology. It also  
488 showcases how interactions between host and pathogen physiology, and the environment can

489 exacerbate or mitigate the costs of a disease. The relationship between EWL, fungal growth, and  
490 humidity suggests that bats found in some parts of western North America, where hibernacula  
491 are often drier than eastern hibernacula, may not be as impacted by WNS as eastern populations.  
492 Additionally, species and populations that inhabit more arid environments tend to have lower  
493 rates of EWL [72] due to adaptations to allow maintenance of water balance in sub-optimal  
494 conditions, and thus may not experience high WNS-related mortality [23]. The non-linear  
495 interplay of temperature, humidity, and behavior (selecting roosting conditions) needs further  
496 analysis, and our model provides a tool to address these questions. The model allows for species-  
497 specific parameterization and interspecific variation in morphometrics, physiology, and roosting  
498 habitats, suggesting that morphometric and physiological data from western bat species is  
499 needed. With this modified hibernation energetics model, we now have the tool to assess the  
500 potential impact of WNS on populations that have different hibernation behaviors than  
501 previously impacted species.

502 **Acknowledgments:** We thank Quinn Fletcher and other members of the U. of Winnipeg bat lab  
503 for help with field data on mass loss of hibernating bats. We thank L. Hanauska-Brown for  
504 helping obtain permits and B. Maxwell and D. Bachen for site identification. We appreciate the  
505 field help from H. D. Bobbitt, D. Taylor, D. Jones, D. Crowley, E. Brandell, G. Botto, E. Lee, K.  
506 Smucker, and D. Bishop. This study was supported with equipment from Texas Tech University.  
507 This project has been funded in whole with Federal funds from the Department of Defense  
508 Strategic Environmental Research and Development Program, under Contract Number  
509 W912HQ-16-C-0015. RP was supported by DARPA D16AP00113, NSF DEB-1716698, NIH  
510 P20GM103474, and NIH P30GM110732. DTS is supported by RDF-MAU1701. CKRW and  
511 KJON were supported by NSERC, Canada, USFWS, and Species at Risk Research Fund of



512 Ontario. **Author contributions:** CGH wrote the manuscript and performed the analyses. CGH,  
513 NWF, KAS, KJON obtained field data. CGH, NWF, CRH, DTSH, SHO, and LPM developed  
514 the model. RKP, SHO, DTSH, and LPM acquired funding and designed the study. CGH, CRH,  
515 DTSH, NWF, LPM, RKP, CKRW, and SHO edited the manuscript.

516 **Competing interests:** The authors declare that they have no competing interests. Any opinions,  
517 findings, and conclusions or recommendations expressed in this publication are those of the  
518 author(s) and do not necessarily reflect the views of the Government.

519 **Data and materials availability:** All data needed to evaluate the conclusions of the paper are  
520 available in the paper. Additional data or code related to this paper may be requested from the  
521 authors.

## 522 **References**

- 523 1. Thomas DW, Dorais M, Bergeron J-M. Winter energy budgets and cost of arousals for  
524 hibernating little brown bats, *Myotis lucifugus*. *Journal of Mammalogy*. 1990;71: 475–479.  
525 doi:10.2307/1381967
- 526 2. Ben-Hamo M, Muñoz-Garcia A, Williams JB, Korine C, Pinshow B. Waking to drink: rates  
527 of evaporative water loss determine arousal frequency in hibernating bats. *Journal of*  
528 *Experimental Biology*. 2013;216: 573–577. doi:10.1242/jeb.078790
- 529 3. Thomas DW, Geiser F. Periodic arousals in hibernating mammals: is evaporative water loss  
530 involved? *Functional Ecology*. 1997;11: 585–591. doi:10.1046/j.1365-2435.1997.00129.x
- 531 4. Fisher KC. On the mechanism of periodic arousal in the hibernating ground squirrel.  
532 *Annales Academiae scientiarum fennicae Ser A*. 1964;71: 143–156.
- 533 5. Thomas DW, Cloutier D. Evaporative water loss by hibernating little brown bats, *Myotis*  
534 *lucifugus*. *Physiological Zoology*. 1992;65: 443–456.

- 535 6. Kallen FC. Some aspects of water balance in the hibernating bat. *Annales Academie*  
536 *Scientiarum Fennicae*. Suomalainen Tiedeakatemia; 1964. pp. 259–267.
- 537 7. Humphries MM, Thomas DW, Speakman JR. Climate-mediated energetic constraints on  
538 the distribution of hibernating mammals. *Nature*. 2002;418: 313–316.  
539 doi:10.1038/nature00828
- 540 8. Boyles JG, McKechnie AE. Energy conservation in hibernating endotherms: Why  
541 “suboptimal” temperatures are optimal. *Ecological Modelling*. 2010;221: 1644–1647.  
542 doi:10.1016/j.ecolmodel.2010.03.018
- 543 9. Nelson RA. Nitrogen turnover and its conservation in hibernation. *Living in the Cold*. Paris:  
544 John Libbey Eurotext; 1989. pp. 299–307.
- 545 10. Herreid CF, Schmidt-Nielsen K. Oxygen consumption, temperature, and water loss in bats  
546 from different environments. *Am J Physiol*. 1966;211: 1108–1112.
- 547 11. Morris S, Curtin AL, Thompson MB. Heterothermy, torpor, respiratory gas exchange,  
548 water balance and the effect of feeding in Gould’s long-eared bat *Nyctophilus gouldi*.  
549 *Journal of Experimental Biology*. 1994;197: 309–335.
- 550 12. Schmidt-Nielsen K, editor. *Animal Physiology: Adaptation and Environment*. 3rd ed.  
551 London; New York: Cambridge University Press; 1987.
- 552 13. Cryan PM, Meteyer CU, Blehert DS, Lorch JM, Reeder DM, Turner GG, et al. Electrolyte  
553 depletion in white-nose syndrome bats. *Journal of Wildlife Diseases*. 2013;49: 398–402.
- 554 14. Wang LCH. Energetics and field aspects of mammalian torpor: the Richardson’s ground  
555 squirrel. In: Wang LCH, Hudson JW, editors. *Strategies in the Cold*. New York: Academic  
556 Press; 1978. pp. 109–145.

- 557 15. Willis CKR, Menzies AK, Boyles JG, Wojciechowski MS. Evaporative water loss is a  
558 plausible explanation for mortality of bats from white-nose syndrome. *Integr Comp Biol*.  
559 2011;51: 364–373. doi:10.1093/icb/icer076
- 560 16. Cryan PM, Meteyer CU, Boyles JG, Blehert DS. Wing pathology of white-nose syndrome  
561 in bats suggests life-threatening disruption of physiology. *BMC Biology*. 2010;8: 135.  
562 doi:10.1186/1741-7007-8-135
- 563 17. Meteyer CU, Buckles EL, Blehert DS, Hicks AC, Green DE, Shearn-Bochsler V, et al.  
564 Histopathologic criteria to confirm white-nose syndrome in bats. *Journal of Veterinary*  
565 *Diagnostic Investigation*. 2009;21: 411–414.
- 566 18. Warnecke L, Turner JM, Bollinger TK, Misra V, Cryan PM, Blehert DS, et al.  
567 Pathophysiology of white-nose syndrome in bats: a mechanistic model linking wing  
568 damage to mortality. *Biology Letters*. 2013;9: 20130177. doi:10.1098/rsbl.2013.0177
- 569 19. Verant ML, Meteyer CU, Speakman JR, Cryan PM, Lorch JM, Blehert DS. White-nose  
570 syndrome initiates a cascade of physiologic disturbances in the hibernating bat host. *BMC*  
571 *Physiology*. 2014;14: 10. doi:10.1186/s12899-014-0010-4
- 572 20. McGuire LP, Mayberry HW, Willis CKR. White-nose syndrome increases torpid metabolic  
573 rate and evaporative water loss in hibernating bats. *Am J Physiol Regul Integr Comp*  
574 *Physiol*. 2017;313: R680–R686. doi:10.1152/ajpregu.00058.2017
- 575 21. Boyles JG, Willis CK. Could localized warm areas inside cold caves reduce mortality of  
576 hibernating bats affected by white-nose syndrome? *Frontiers in Ecology and the*  
577 *Environment*. 2010;8: 92–98. doi:10.1890/080187

- 578 22. Verant ML, Boyles JG, Waldrep W, Wibbelt G, Blehert DS. Temperature-dependent  
579 growth of *Geomyces destructans*, the fungus that causes bat white-nose syndrome. PLOS  
580 ONE. 2012;7: e46280. doi:10.1371/journal.pone.0046280
- 581 23. Marroquin CM, Lavine JO, Windstam ST. Effect of humidity on development of  
582 *Pseudogymnoascus destructans*, the causal agent of bat white-nose syndrome. Northeastern  
583 Naturalist. 2017;24: 54–64. doi:10.1656/045.024.0105
- 584 24. Humphries MM, Thomas DW, Speakman JR. Climate-mediated energetic constraints on  
585 the distribution of hibernating mammals. Nature. 2002;418: 313–316.  
586 doi:10.1038/nature00828
- 587 25. Hayman DTS, Pulliam JRC, Marshall JC, Cryan PM, Webb CT. Environment, host, and  
588 fungal traits predict continental-scale white-nose syndrome in bats. Science Advances.  
589 2016;2: e1500831. doi:10.1126/sciadv.1500831
- 590 26. Fenton MB, Barclay RMR. *Myotis lucifugus*. Mammalian Species. 1980; 1–8.  
591 doi:10.2307/3503792
- 592 27. Fenton MB. Population studies of *Myotis lucifugus* (Chiroptera: Vespertilionidae) in  
593 Ontario. Toronto, Canada: The Royal Ontario Museum; 1970. Available:  
594 <https://www.biodiversitylibrary.org/item/111399>
- 595 28. Langwig KE, Frick WF, Hoyt JR, Parise KL, Drees KP, Kunz TH, et al. Drivers of  
596 variation in species impacts for a multi-host fungal disease of bats. Phil Trans R Soc B.  
597 2016;371: 20150456. doi:10.1098/rstb.2015.0456
- 598 29. Frederico P. Bat Population Dynamics: An Individual-based Model Approach. Ph.D.  
599 Dissertation, University of Tennessee. 2007.

- 600 30. Boyles JG, Brack V. Modeling survival rates of hibernating mammals with individual-  
601 based models of energy expenditure. *J Mammal.* 2009;90: 9–16. doi:10.1644/08-MAMM-  
602 A-205.1
- 603 31. Jonasson KA, Willis CKR. Hibernation energetics of free-ranging little brown bats. *J Exp*  
604 *Biol.* 2012;215: 2141–2149. doi:10.1242/jeb.066514
- 605 32. Ehlman SM, Cox JJ, Crowley PH. Evaporative water loss, spatial distributions, and survival  
606 in white-nose-syndrome-affected little brown myotis: a model. *J Mammal.* 2013;94: 572–  
607 583. doi:10.1644/12-MAMM-A-111.1
- 608 33. Burles DW, Fenton MB, Barclay RM, Brigham RM, Volkens D. Aspects of the winter  
609 ecology of bats on Haida Gwaii, British Columbia. *Northwestern Naturalist.* 2014;95: 289–  
610 299. doi:10.1898/12-32.1
- 611 34. Wilcox A, Willis CK. Energetic benefits of enhanced summer roosting habitat for little  
612 brown bats (*Myotis lucifugus*) recovering from white-nose syndrome. *Conservation*  
613 *Physiology.* 2016;4: cov070.
- 614 35. Czenze ZJ, Jonasson KA, Willis CKR. Thrifty females, frisky males: Winter energetics of  
615 hibernating bats from a cold climate. *Physiological and Biochemical Zoology.* 2017;90:  
616 502–511. doi:10.1086/692623
- 617 36. Frick WF, Pollock JF, Hicks AC, Langwig KE, Reynolds DS, Turner GG, et al. An  
618 emerging disease causes regional population collapse of a common North American bat  
619 species. *Science.* 2010;329: 679–682. doi:10.1126/science.1188594
- 620 37. Blehert DS, Hicks AC, Behr M, Meteyer CU, Berlowski-Zier BM, Buckles EL, et al. Bat  
621 white-nose syndrome: An emerging fungal pathogen? *Science.* 2009;323: 227–227.  
622 doi:10.1126/science.1163874

- 623 38. Dzal Y, McGuire LP, Veselka N, Fenton MB. Going, going, gone: the impact of white-nose  
624 syndrome on the summer activity of the little brown bat (*Myotis lucifugus*). Biol Lett.  
625 2011;7: 392–394. doi:10.1098/rsbl.2010.0859
- 626 39. Langwig KE, Frick WF, Bried JT, Hicks AC, Kunz TH, Marm Kilpatrick A. Sociality,  
627 density-dependence and microclimates determine the persistence of populations suffering  
628 from a novel fungal disease, white-nose syndrome. Ecol Lett. 2012;15: 1050–1057.  
629 doi:10.1111/j.1461-0248.2012.01829.x
- 630 40. McGuire LP, Guglielmo CG. Quantitative magnetic resonance: a rapid, noninvasive body  
631 composition analysis technique for live and salvaged bats. J Mammal. 2010;91: 1375–1380.  
632 doi:10.1644/10-MAMM-A-051.1
- 633 41. Fuller NW, Haase CG, Silas KA, Olson SH, McGuire LP. Tradeoffs between energy  
634 conservation and the costs of torpor: hibernation of *Myotis velifer* at low latitudes. Journal  
635 of Comparative Physiology B. In press;
- 636 42. Corben C. AnaBat (version 6.0) and AnaLook (version 4.9 j)[computer programs]. 2004.
- 637 43. Lausen CL, Barclay RMR. Winter bat activity in the Canadian prairies. Can J Zool.  
638 2006;84: 1079–1086. doi:10.1139/z06-093
- 639 44. Haase CG, Fuller NW, Hranac CR, Hayman DTS, Olson S, Plowright R, et al. Bats are not  
640 squirrels: revisiting the cost of cooling in hibernating mammals. Journal of Thermal  
641 Biology. 2019;81: 185–193.
- 642 45. Geiser F, Kenagy GJ. Torpor duration in relation to temperature and metabolism in  
643 hibernating ground squirrels. Physiological Zoology. 1988;61: 442–449.
- 644 46. Thomas DW, Geiser F. Periodic arousals in hibernating mammals: is evaporative water loss  
645 involved? Functional Ecology. 11: 585–591. doi:10.1046/j.1365-2435.1997.00129.x

- 646 47. Geiser F. Metabolic rate and body temperature reduction during hibernation and daily  
647 torpor. *Annu Rev Physiol.* 2004;66: 239–274.  
648 doi:10.1146/annurev.physiol.66.032102.115105
- 649 48. Hock RJ. The metabolic rates and body temperatures of bats. *The Biological Bulletin.*  
650 1951;101: 289–299. doi:10.2307/1538547
- 651 49. Hanus K. Body temperatures and metabolism of bats at different environmental  
652 temperatures. *Physiol Bohemoslov.* 1959;8: 250–259.
- 653 50. Speakman JR, Webb PI, Racey PA. Effects of disturbance on the energy expenditure of  
654 hibernating bats. *Journal of Applied Ecology.* 1991;28: 1087–1104. doi:10.2307/2404227
- 655 51. Brack V, Twente JW. The duration of the period of hibernation of three species of  
656 vespertilionid bats. I. Field studies. *Can J Zool.* 1985;63: 2952–2954. doi:10.1139/z85-442
- 657 52. Campbell GS, Norman JM. *An Introduction to Environmental Biophysics* [Internet]. New  
658 York: Springer-Verlag; 1998. Available: <http://www.springer.com/us/book/9780387949376>
- 659 53. Gouma E, Simos Y, Verginadis I, Lykoudis E, Evangelou A, Karkabounas S. A simple  
660 procedure for estimation of total body surface area and determination of a new value of  
661 Meeh’s constant in rats. *Laboratory Animals.* 2012;46: 40–45. doi:10.1258/la.2011.011021
- 662 54. McGuire LP, Mayberry HW, Fletcher QE, Willis CKR. An experimental test of energy and  
663 electrolyte supplementation as a mitigation strategy for white-nose syndrome. *Conserv*  
664 *Physiol.* 2019;7. doi:10.1093/conphys/coz006
- 665 55. Speakman JR, Thomas DW. *Physiological Ecology and Energetics of Bats.* In: Kunz TH,  
666 Fenton MB, editors. *Bat Ecology.* First. Chicago and London: University Of Chicago Press;  
667 2003. pp. 430–490.

- 668 56. Norquay KJO, Martinez-Nuñez F, Dubois JE, Monson KM, Willis CKR. Long-distance  
669 movements of little brown bats (*Myotis lucifugus*). *J Mammal*. 2013;94: 506–515.  
670 doi:10.1644/12-MAMM-A-065.1
- 671 57. Bilecki LC. Bat Hibernacula in the Karst Landscape of Central Manitoba: Protecting  
672 Critical Wildlife Habitat while Managing for Resource Development. M.S. Thesis,  
673 University of Manitoba. 2003.
- 674 58. Czenze ZJ, Willis CKR. Warming up and shipping out: arousal and emergence timing in  
675 hibernating little brown bats (*Myotis lucifugus*). *J Comp Physiol B, Biochem Syst Environ*  
676 *Physiol*. 2015;185: 575–586. doi:10.1007/s00360-015-0900-1
- 677 59. Reeder DM, Frank CL, Turner GG, Meteyer CU, Kurta A, Britzke ER, et al. Frequent  
678 arousal from hibernation linked to severity of infection and mortality in bats with white-  
679 nose syndrome. *PLOS ONE*. 2012;7: e38920. doi:10.1371/journal.pone.0038920
- 680 60. Brownlee-Bouboulis SA, Reeder DM. White-nose syndrome-affected little brown myotis  
681 (*Myotis lucifugus*) increase grooming and other active behaviors during arousals from  
682 hibernation. *J Wildl Dis*. 2013;49: 850–859. doi:10.7589/2012-10-242
- 683 61. Storm JJ, Boyles JG. Body temperature and body mass of hibernating little brown bats  
684 *Myotis lucifugus* in hibernacula affected by white-nose syndrome. *Acta Theriol*. 2011;56:  
685 123–127. doi:10.1007/s13364-010-0018-5
- 686 62. Maslo B, Fefferman NH. A case study of bats and white-nose syndrome demonstrating how  
687 to model population viability with evolutionary effects. *Conservation Biology*. 2015;29:  
688 1176–1185. doi:10.1111/cobi.12485
- 689 63. Gonzalez Andrew, Ronce Ophélie, Ferriere Regis, Hochberg Michael E. Evolutionary  
690 rescue: an emerging focus at the intersection between ecology and evolution. *Philosophical*



- 691 Transactions of the Royal Society B: Biological Sciences. 2013;368: 20120404.  
692 doi:10.1098/rstb.2012.0404
- 693 64. Bandouchova H, Bartonička T, Berkova H, Brichta J, Kokurewicz T, Kovacova V, et al.  
694 Alterations in the health of hibernating bats under pathogen pressure. Scientific Reports.  
695 2018;8: 6067. doi:10.1038/s41598-018-24461-5
- 696 65. Chaturvedi V, Springer DJ, Behr MJ, Ramani R, Li X, Peck MK, et al. Morphological and  
697 molecular characterizations of psychrophilic fungus *Geomyces destructans* from New York  
698 bats with white nose syndrome (WNS). PLOS ONE. 2010;5: e10783.  
699 doi:10.1371/journal.pone.0010783
- 700 66. Warnecke L, Turner JM, Bollinger TK, Lorch JM, Misra V, Cryan PM, et al. Inoculation of  
701 bats with European *Geomyces destructans* supports the novel pathogen hypothesis for the  
702 origin of white-nose syndrome. PNAS. 2012;109: 6999–7003.  
703 doi:10.1073/pnas.1200374109
- 704 67. Cheng TL, Gerson A, Moore MS, Reichard JD, DeSimone J, Willis CKR, et al. Higher fat  
705 stores contribute to persistence of little brown bat populations with white-nose syndrome.  
706 Journal of Animal Ecology. 2019;88: 591–600. doi:10.1111/1365-2656.12954
- 707 68. Dunbar MB, Brigham RM. Thermoregulatory variation among populations of bats along a  
708 latitudinal gradient. J Comp Physiol B. 2010;180: 885–893. doi:10.1007/s00360-010-0457-  
709 y
- 710 69. Speakman JR, Racey PA. Hibernation Ecology of the Pipistrelle Bat: Energy Expenditure,  
711 Water Requirements and Mass Loss, Implications for Survival and the Function of Winter  
712 Emergence Flights. Journal of Animal Ecology. 1989;58: 797–813. doi:10.2307/5125

- 713 70. Jonasson KA, Willis CKR. Changes in Body Condition of Hibernating Bats Support the  
714 Thrifty Female Hypothesis and Predict Consequences for Populations with White-Nose  
715 Syndrome. *PLOS ONE*. 2011;6: e21061. doi:10.1371/journal.pone.0021061
- 716 71. Boyles JG, Dunbar MB, Storm JJ, Brack V. Energy availability influences microclimate  
717 selection of hibernating bats. *Journal of Experimental Biology*. 2007;210: 4345–4350.  
718 doi:10.1242/jeb.007294
- 719 72. Klüg-Baerwald BJ, Brigham RM. Hung out to dry? Intraspecific variation in water loss in a  
720 hibernating bat. *Oecologia*. 2017;183: 977–985. doi:10.1007/s00442-017-3837-0
- 721 73. McNab BK. On estimating thermal conductance in endotherms. *Physiological Zoology*.  
722 1980;53: 145–156.
- 723 74. French AR. Allometries of the durations of torpid and euthermic intervals during  
724 mammalian hibernation: A test of the theory of metabolic control of the timing of changes  
725 in body temperature. *J Comp Physiol B*. 1985;156: 13–19. doi:10.1007/BF00692921
- 726 75. French AR. Effects of temperature on the duration of arousal episodes during hibernation. *J*  
727 *Appl Physiol Respir Environ Exerc Physiol*. 1982;52: 216–220.
- 728 76. Geiser F, Baudinette RV. The relationship between body mass and rate of rewarming from  
729 hibernation and daily torpor in mammals. *J Exp Biol*. 1990;151: 349–359.
- 730 77. Hirshfeld JR, O’Farrell MJ. Comparisons of differential warming rates and tissue  
731 temperatures in some species of desert bats. *Comp Biochem Physiol A Comp Physiol*.  
732 1976;55: 83–87.

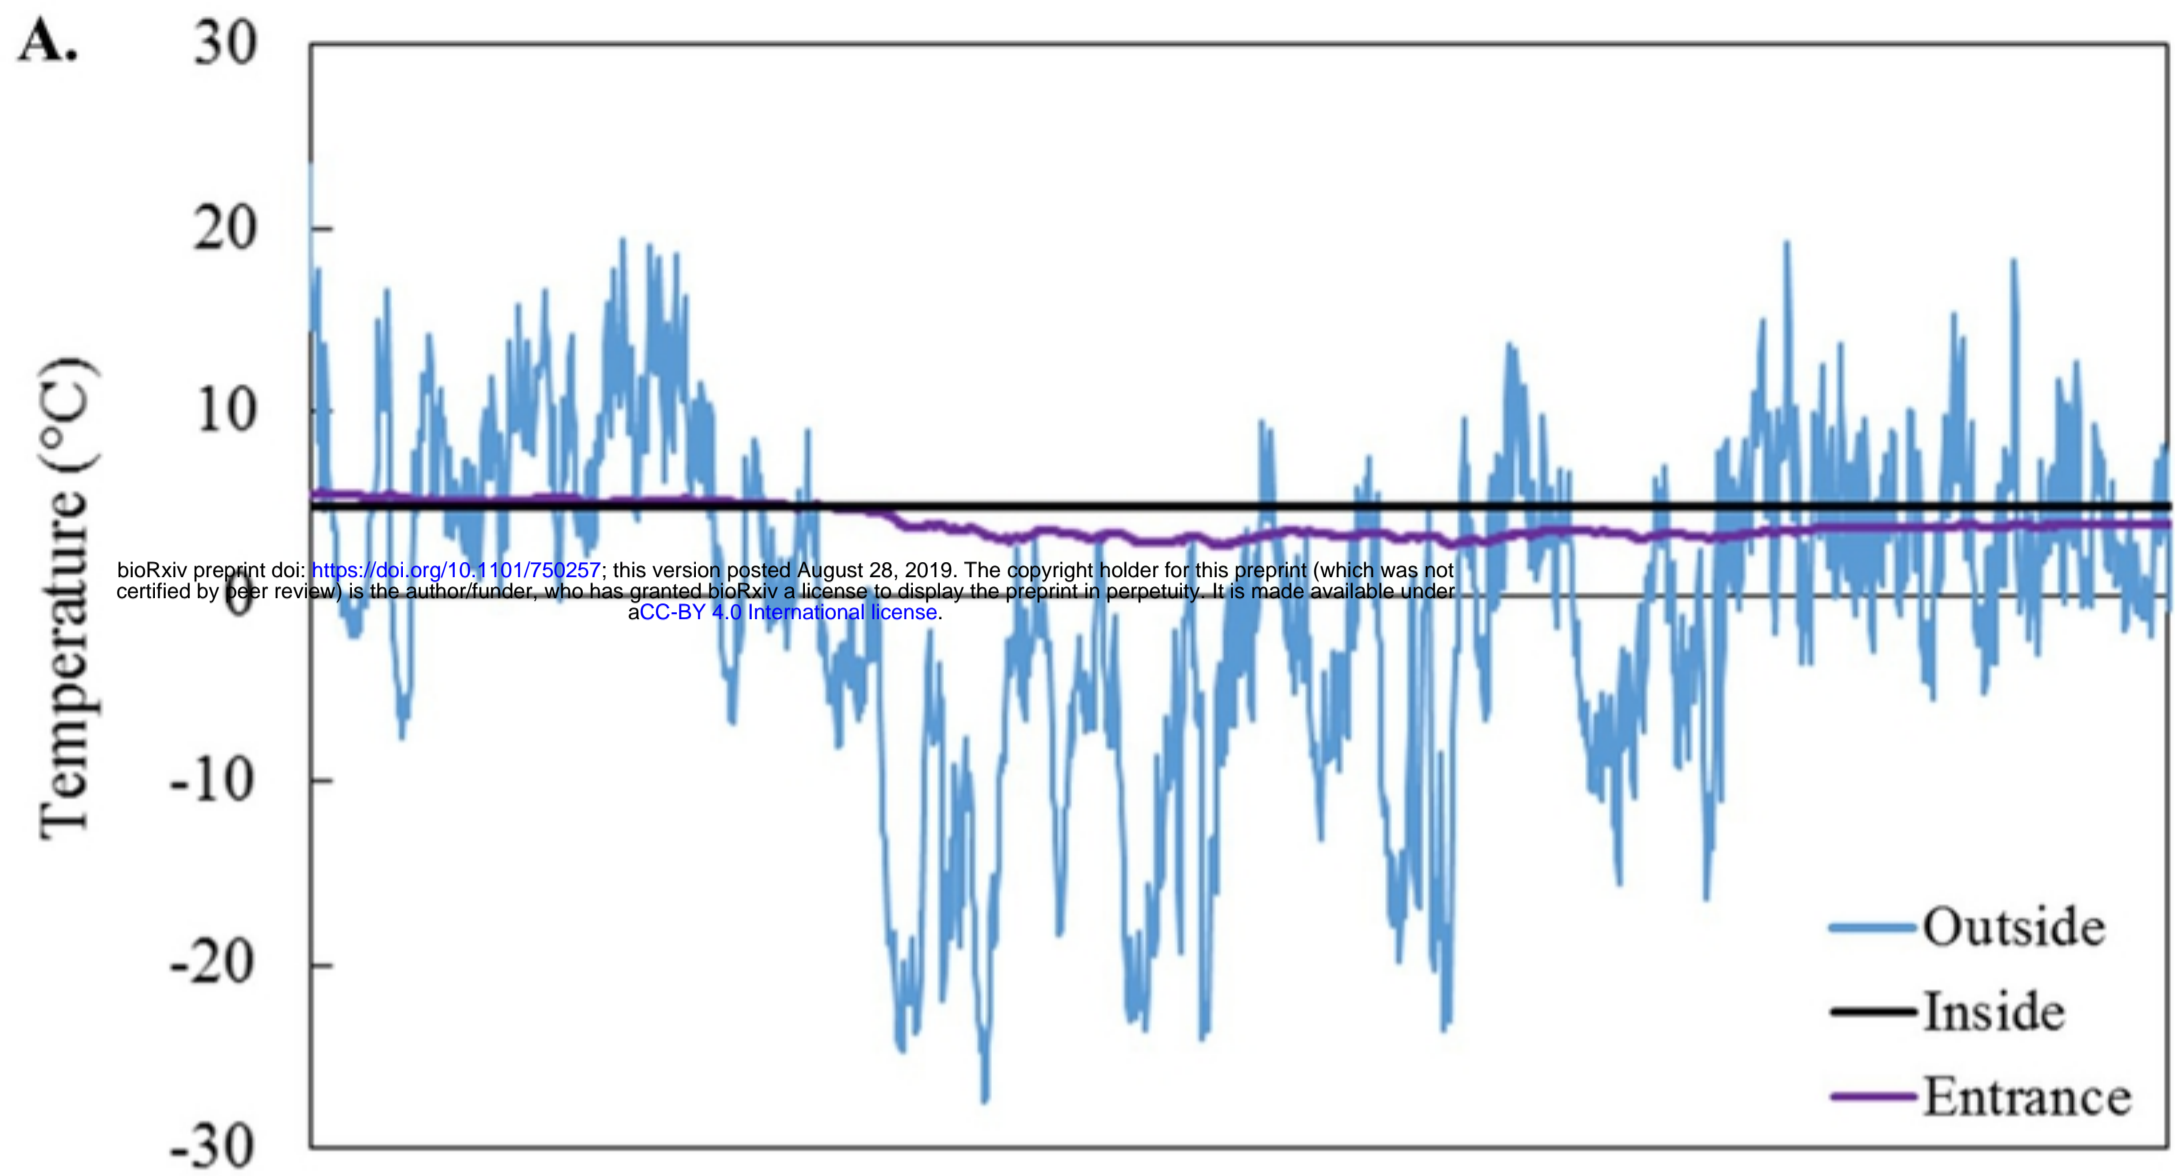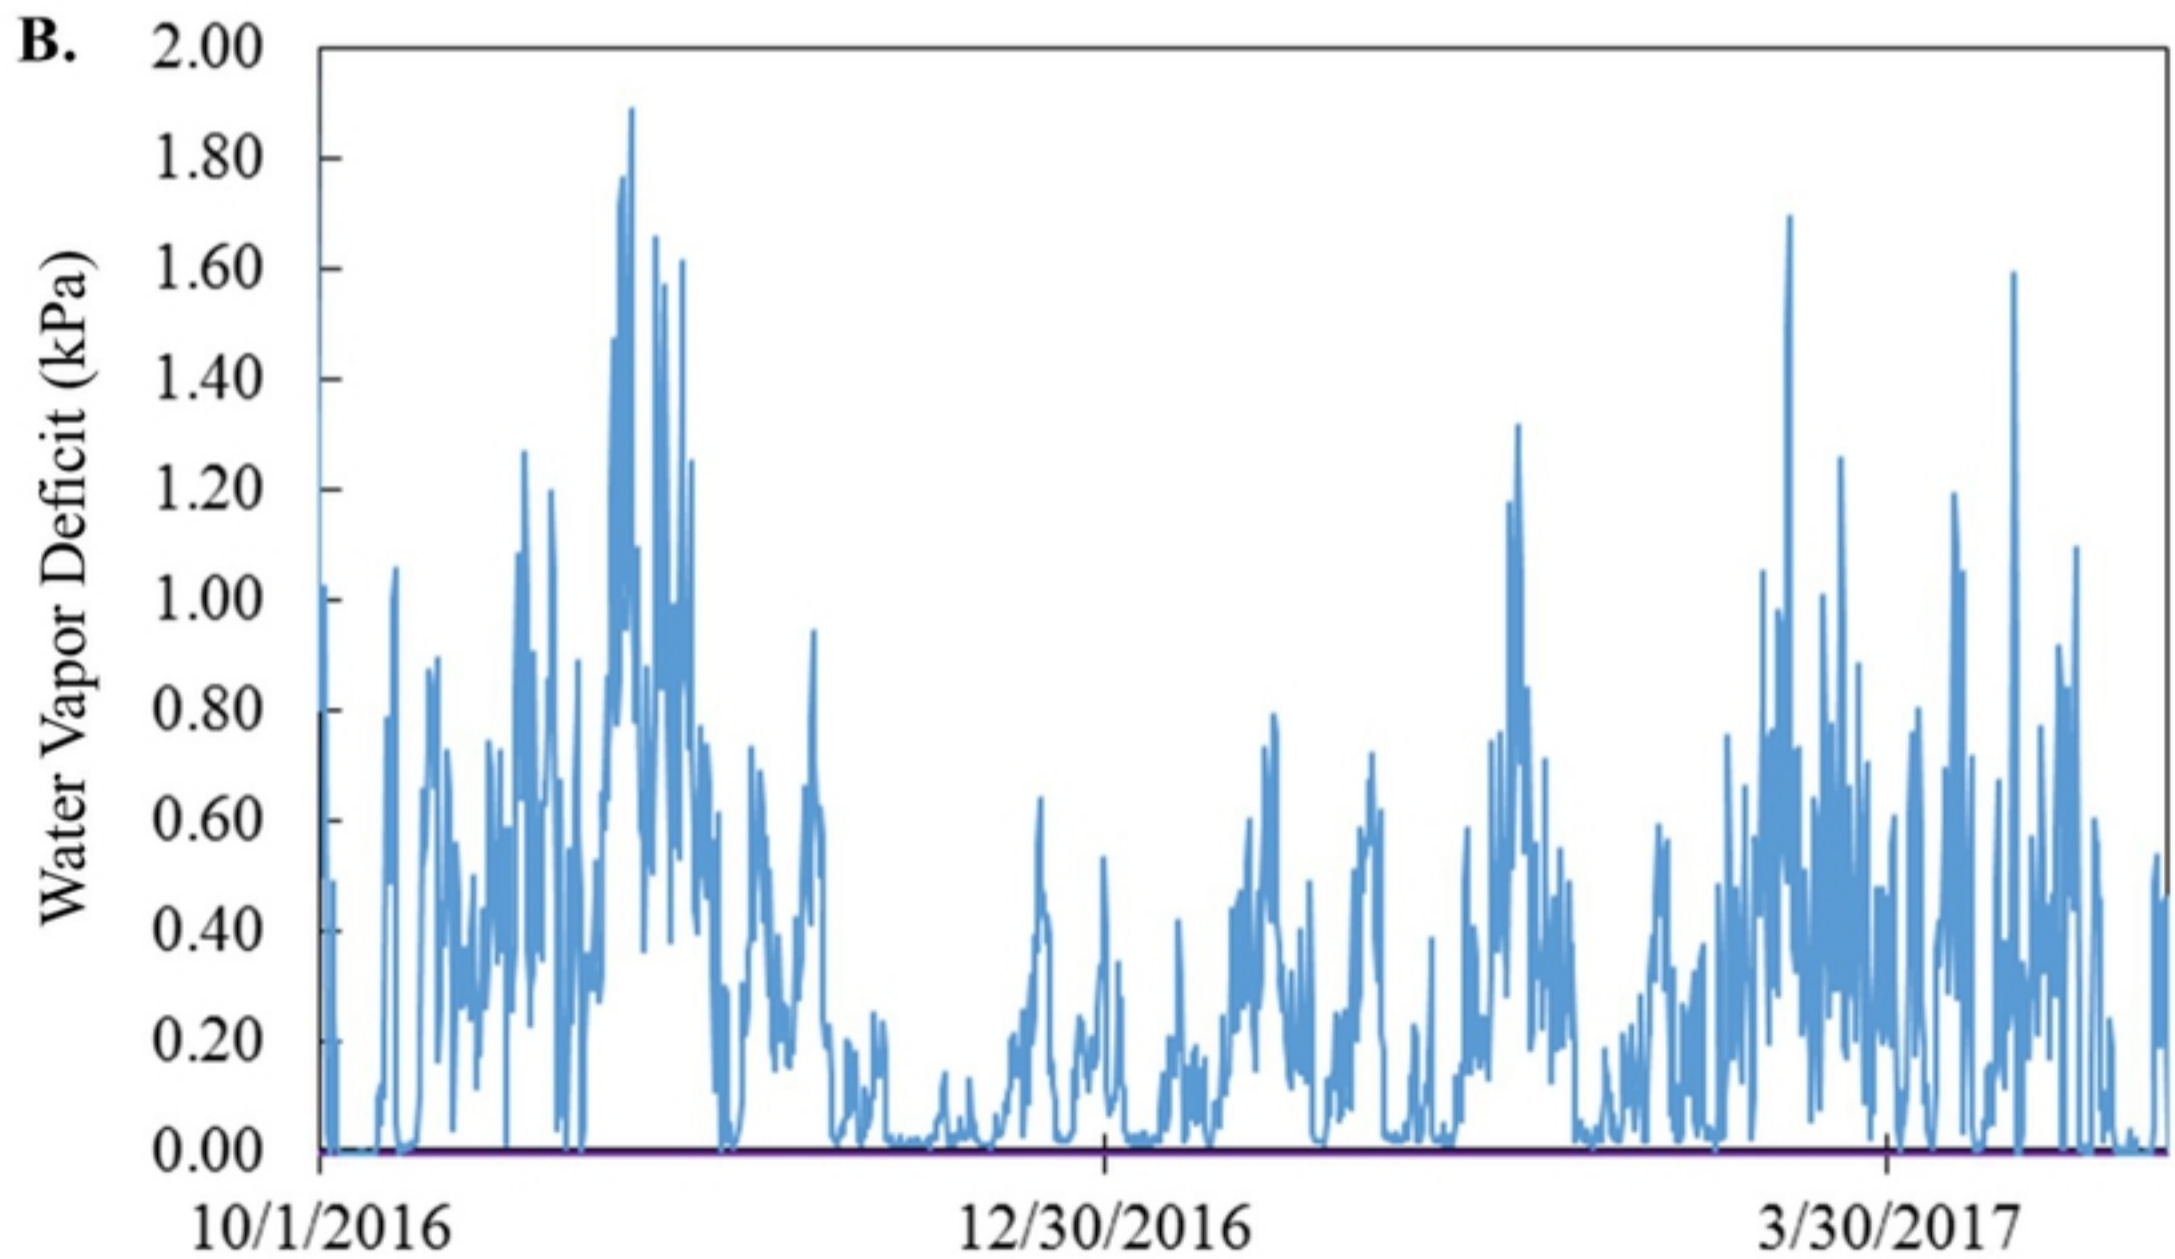

Figure 1

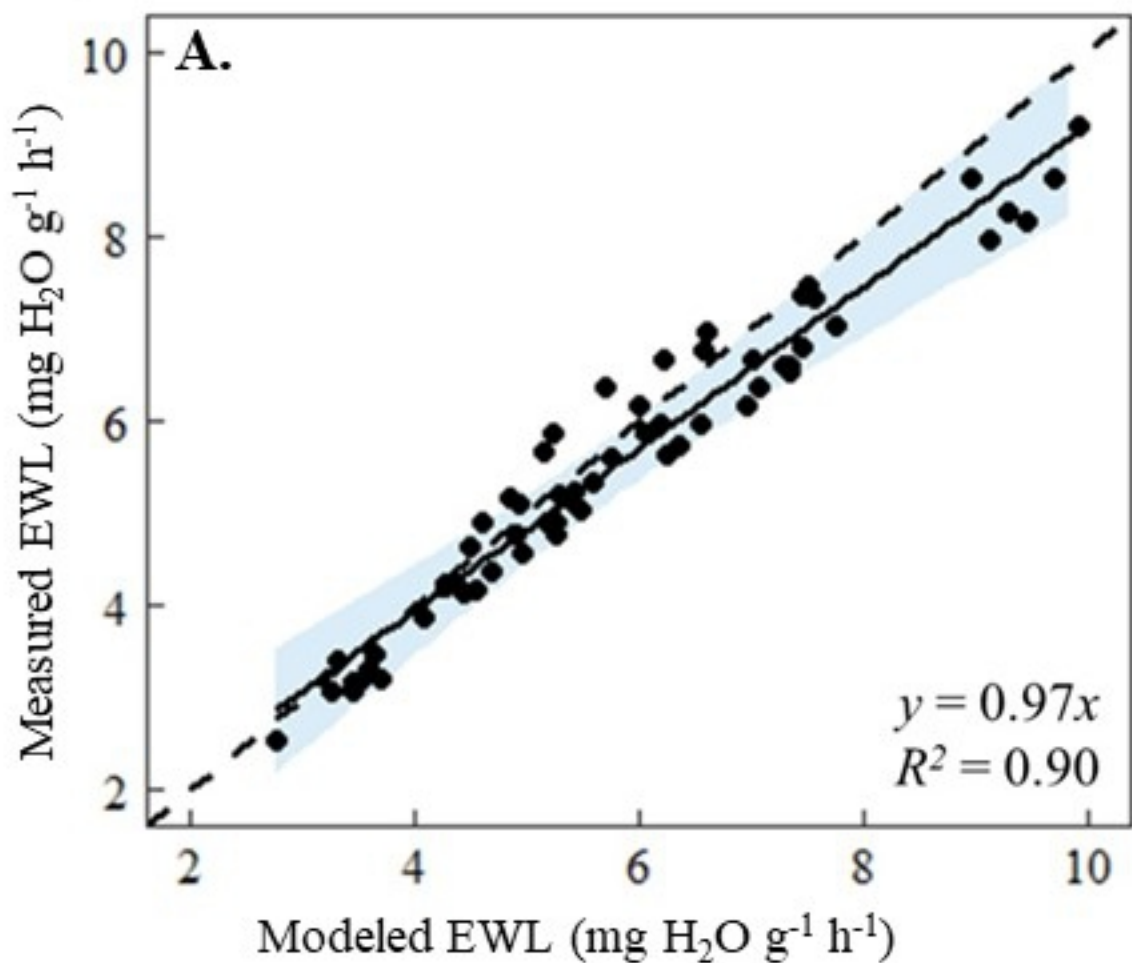

bioRxiv preprint doi: <https://doi.org/10.1101/750257>; this version posted August 28, 2019. The copyright holder for this preprint (which was not certified by peer review) is the author/funder, who has granted bioRxiv a license to display the preprint in perpetuity. It is made available under aCC-BY 4.0 International license.

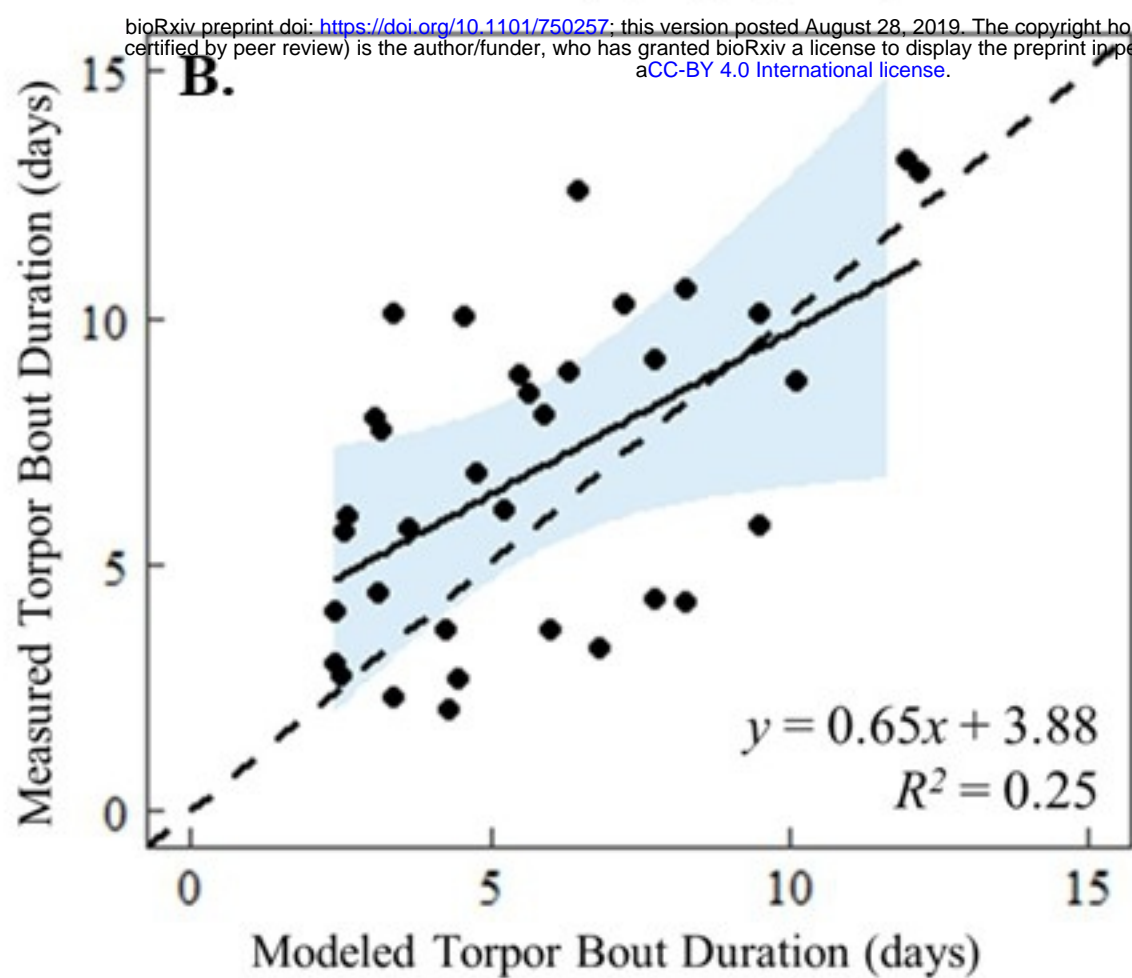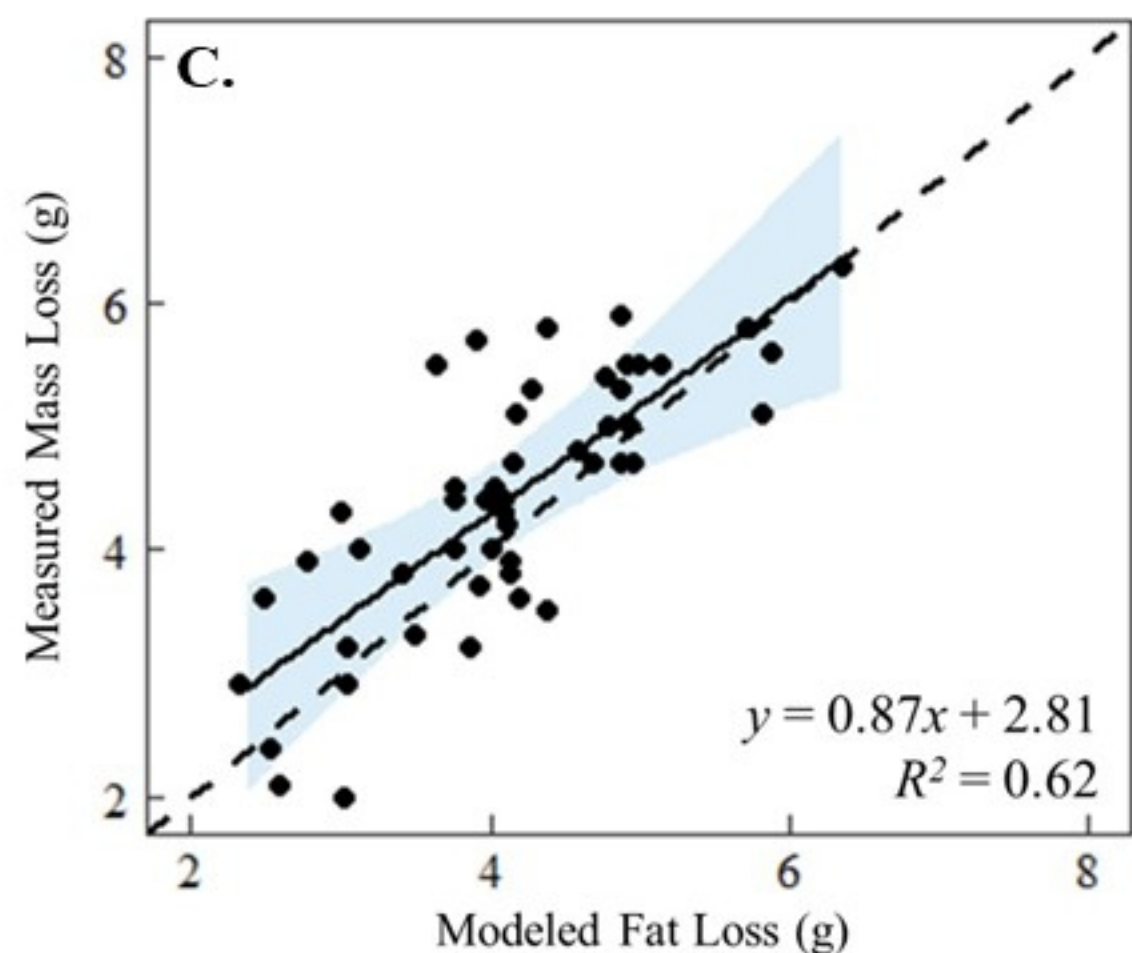

Figure2

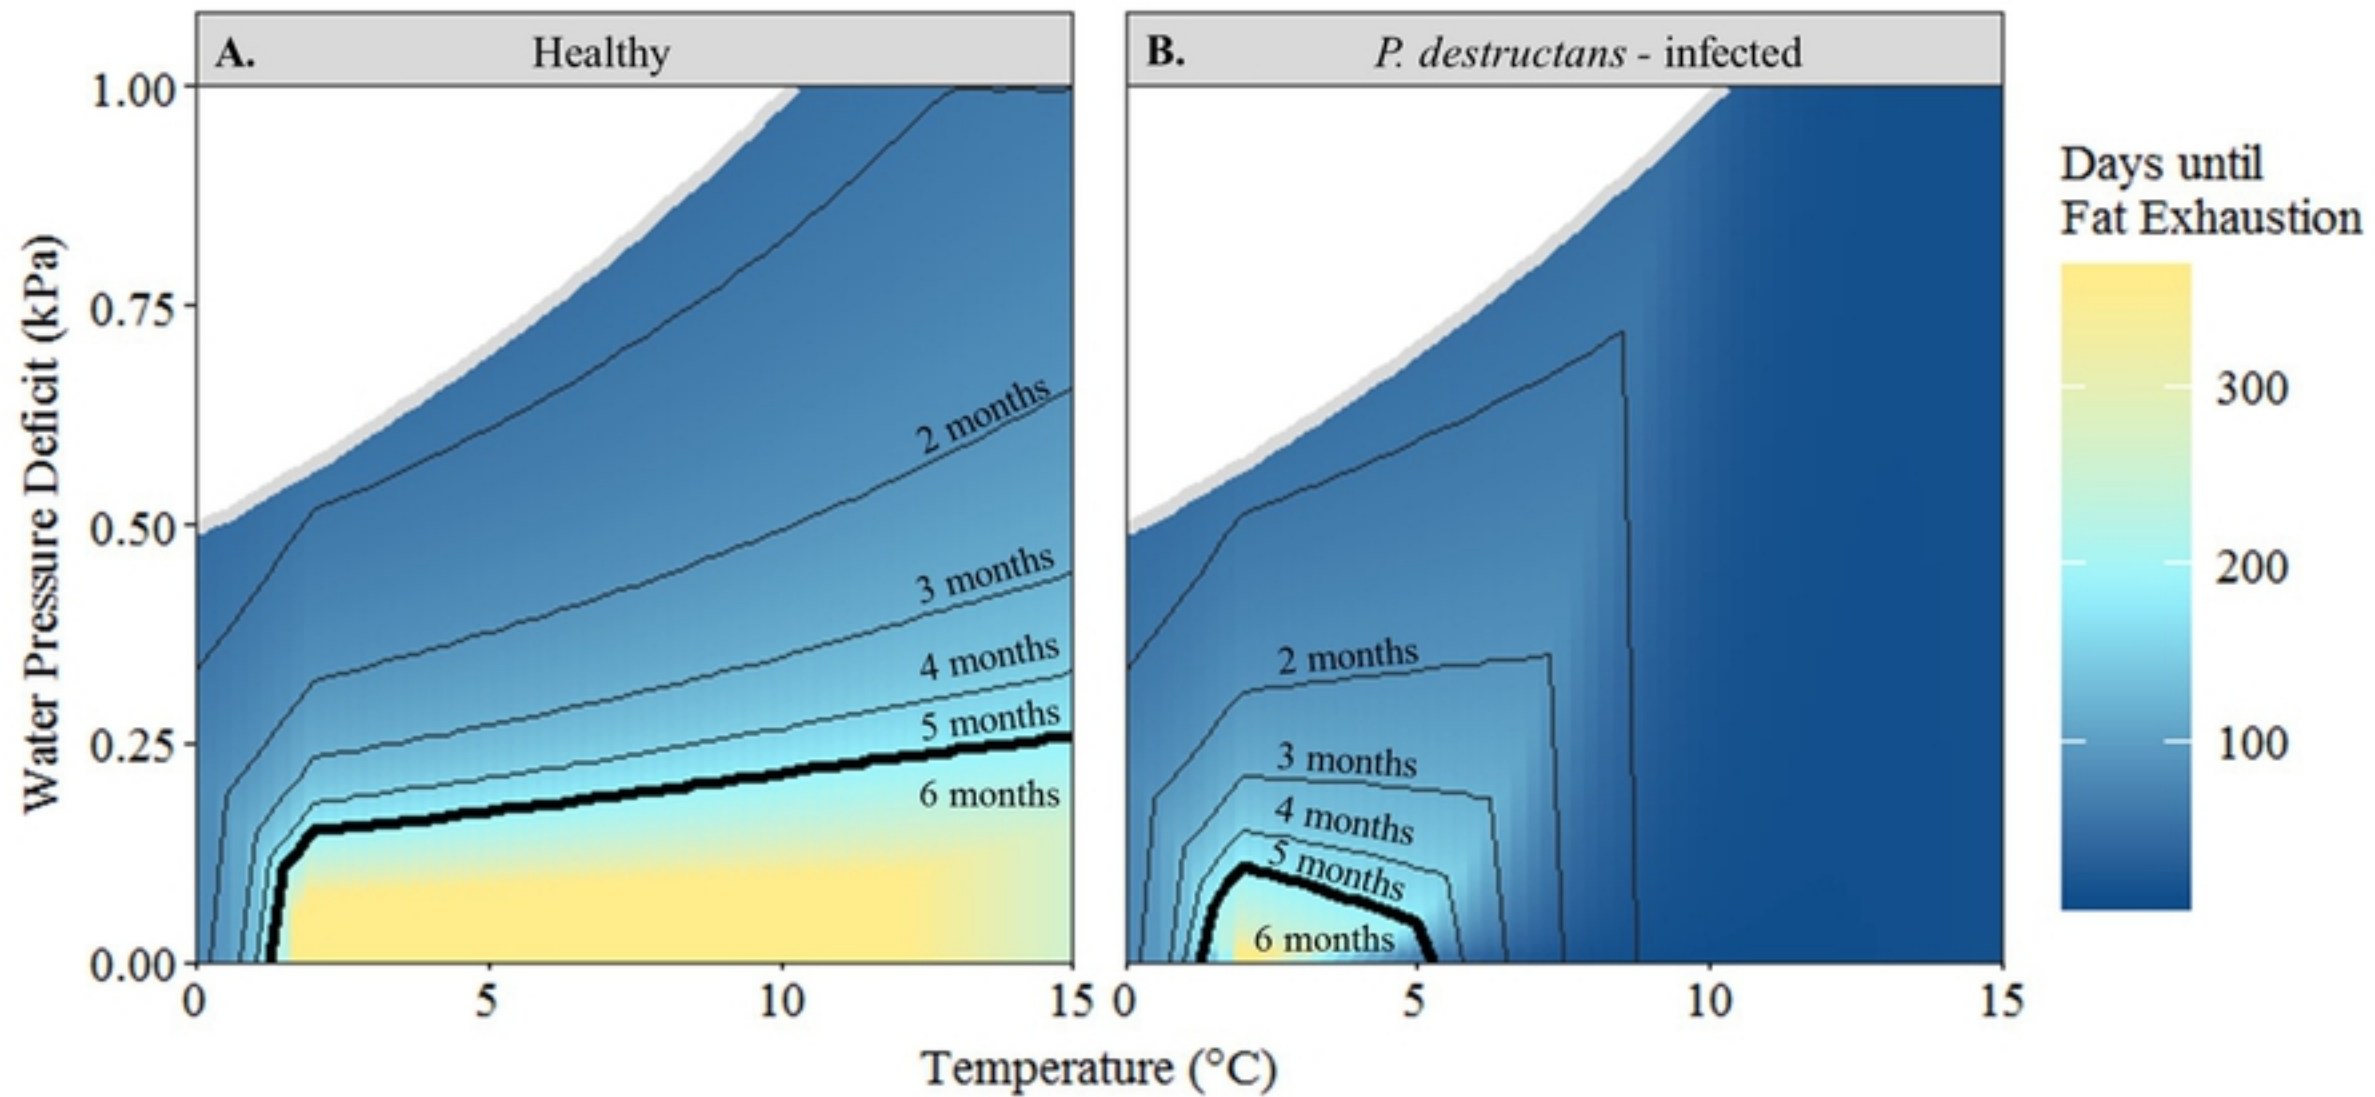

Figure3



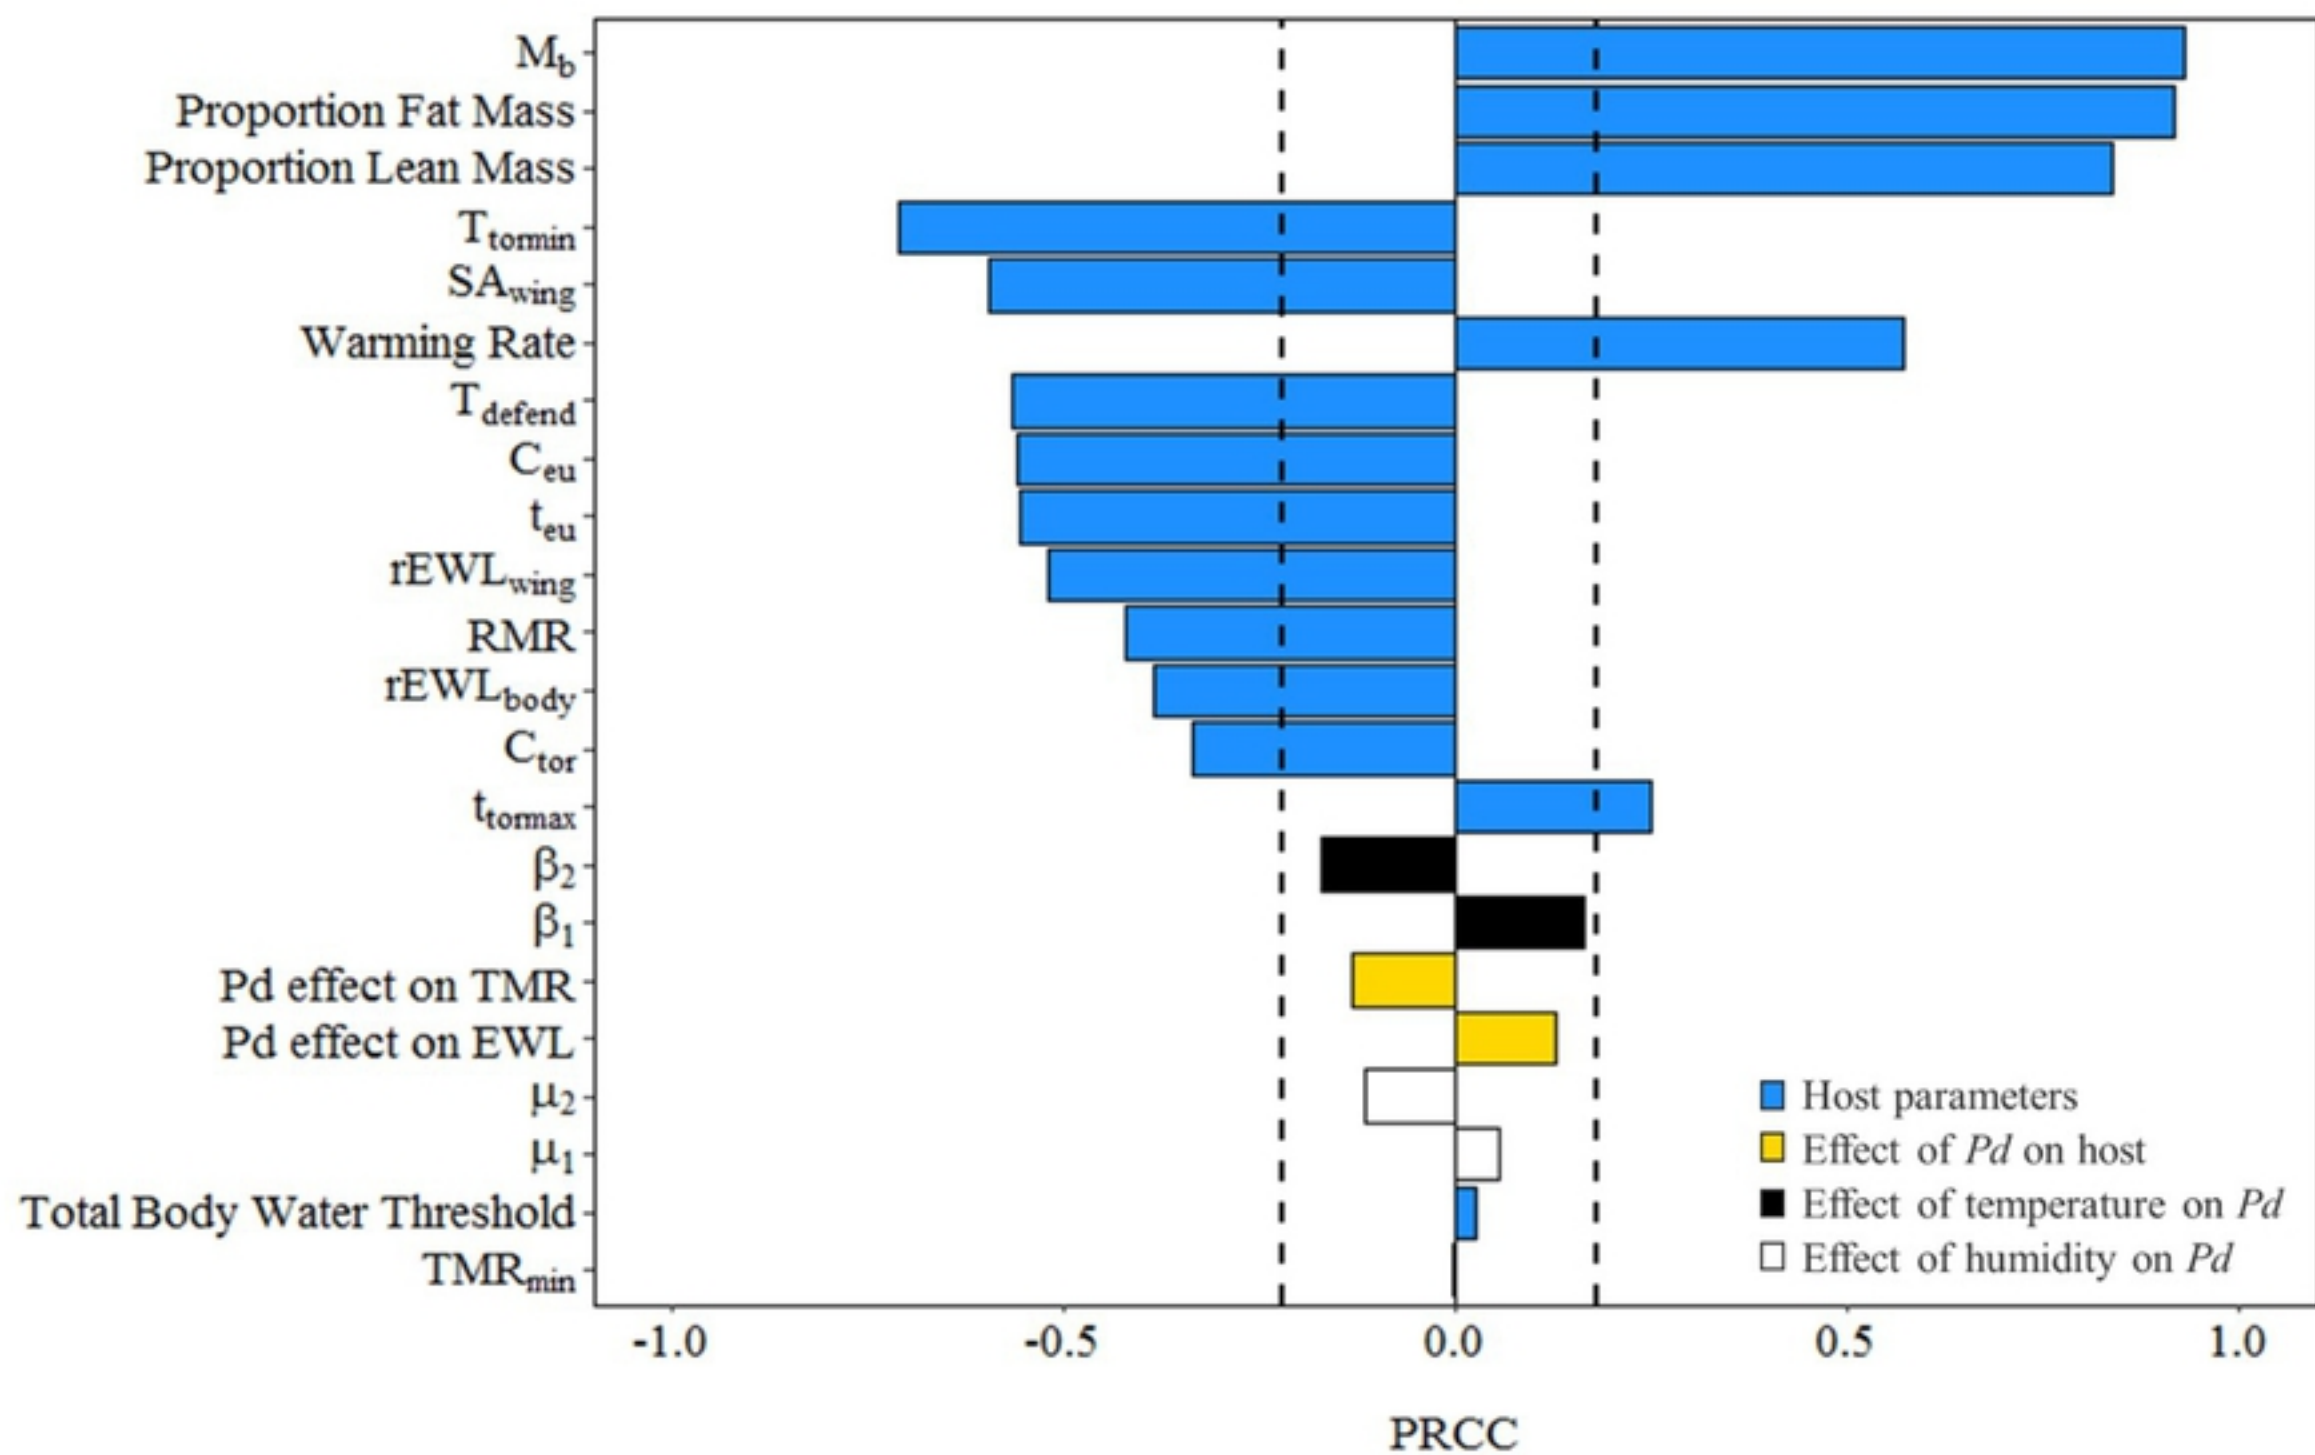

Figure4
